# Supplementary material for: TMB and Inflammatory Gene Expression Associated with Clinical Outcomes following Immunotherapy in Advanced Melanoma
Source: PubMed Central journal article supplement — Cancer Immunol Res. 2021 Aug 13;9(10):1202–13. doi: 10.1158/2326-6066.CIR-20-0983 (PMC9414280; doi:10.1158/2326-6066.cir-20-0983), 2021-08-13
Supplement: cir-20-0983_supplementary_figures_and_tables_suppsft.pdf [file cir-20-0983_supplementary_figures_and_tables_suppsft.pdf]

## Table of contents

|                                                                                                                                                                                                                                                                                                                                                                                                                                                                                                              |    |
|--------------------------------------------------------------------------------------------------------------------------------------------------------------------------------------------------------------------------------------------------------------------------------------------------------------------------------------------------------------------------------------------------------------------------------------------------------------------------------------------------------------|----|
| <b>Supplementary Figure 1.</b> CONSORT diagram for CheckMate 067. ....                                                                                                                                                                                                                                                                                                                                                                                                                                       | 7  |
| <b>Supplementary Figure 2.</b> CONSORT diagram for CheckMate 066. ....                                                                                                                                                                                                                                                                                                                                                                                                                                       | 8  |
| <b>Supplementary Figure 3.</b> TMB for TMB-evaluable patients in the NIVO (n = 176), NIVO+IPI (n = 184), and IPI (n = 178) arms of CheckMate 067. The median TMB for all evaluable patients was 203.5. Boxes extend from the first to third quartiles, the middle line shows the median, and the whiskers extend to the most extreme data point that is no more than 1.5 times the IQR from the box. IPI, ipilimumab; NIVO, nivolumab; TMB, tumor mutational burden. ....                                    | 9  |
| <b>Supplementary Figure 4.</b> TMB for TMB-evaluable patients in the NIVO (n = 52) and dacarbazine (n = 67) treatment arms of CheckMate 066. Dashed line represents the study median TMB value. The median TMB value for all evaluable patients was 157.0. Boxes extend from the first to third quartiles, the middle line shows the median, and the whiskers extend to the most extreme data point that is no more than 1.5 times the IQR from the box. NIVO, nivolumab; TMB, tumor mutational burden. .... | 10 |
| <b>Supplementary Figure 5.</b> Distribution of inflammatory signature scores in the NIVO (n = 97), NIVO + IPI (n = 85), and IPI (n = 87) treatment arms of CheckMate 067. The median baseline inflammatory signature score for all evaluable patients was -0.04. Boxes extend from the first to third quartiles, the middle line shows the median, and the whiskers extend to the most extreme data point that is no more than 1.5 times the IQR from the box. IPI, ipilimumab; NIVO, nivolumab. ....        | 11 |
| <b>Supplementary Figure 6.</b> Kaplan–Meier curves for PFS versus TMB availability by treatment arm for CheckMate 067. HRs (95% CI) for TMB evaluable versus non-evaluable were obtained with univariate Cox proportional hazards models. CI, confidence interval; HR, hazard ratio; IPI, ipilimumab; NIVO, nivolumab; PFS, progression-free survival; TMB, tumor mutational burden. ....                                                                                                                    | 12 |
| <b>Supplementary Figure 7.</b> Kaplan–Meier curves for OS versus TMB availability by treatment arm for CheckMate 067. HRs (95% CI) for TMB evaluable versus non-evaluable were obtained with univariate Cox proportional hazards models. CI, confidence interval; HR, hazard ratio; IPI, ipilimumab; NIVO, nivolumab; OS, overall survival; TMB, tumor mutational burden. ....                                                                                                                               | 13 |
| <b>Supplementary Figure 8.</b> Kaplan–Meier curves for PFS versus TMB availability by initial treatment for CheckMate 066. HRs (95% CI) for TMB evaluable versus non-evaluable were obtained with univariate Cox proportional hazards models. CI, confidence interval; HR, hazard ratio; NIVO, nivolumab; PFS, progression-free survival; TMB, tumor mutational burden. ....                                                                                                                                 | 14 |

|                                                                                                                                                                                                                                                                                                                                                                                                                                                                                                           |    |
|-----------------------------------------------------------------------------------------------------------------------------------------------------------------------------------------------------------------------------------------------------------------------------------------------------------------------------------------------------------------------------------------------------------------------------------------------------------------------------------------------------------|----|
| <b>Supplementary Figure 9.</b> Kaplan–Meier curves for OS versus TMB availability by initial treatment for CheckMate 066. HRs (95% CI) for TMB evaluable versus non-evaluable were obtained with univariate Cox proportional hazards models. CI, confidence interval; HR, hazard ratio; NIVO, nivolumab; OS, overall survival; TMB, tumor mutational burden. ....                                                                                                                                         | 15 |
| <b>Supplementary Figure 10.</b> Kaplan–Meier curves for PFS versus inflammatory signature score availability by treatment arm for CheckMate 067. HRs (95% CI) for GEP evaluable versus non-evaluable were obtained with univariate Cox proportional hazards models. CI, confidence interval; GEP, gene expression profiling; HR, hazard ratio; IPI, ipilimumab; NIVO, nivolumab; PFS, progression-free survival. ....                                                                                     | 16 |
| <b>Supplementary Figure 11.</b> Kaplan–Meier curves for OS versus inflammatory signature score availability by treatment arm for CheckMate 067. HRs (95% CI) for GEP evaluable versus non-evaluable were obtained with univariate Cox proportional hazards models. CI, confidence interval; GEP, gene expression profiling; HR, hazard ratio; IPI, ipilimumab; NIVO, nivolumab; OS, overall survival. ....                                                                                                | 17 |
| <b>Supplementary Figure 12.</b> Distribution of TMB by BOR with NIVO or dacarbazine in CheckMate 066. Number of responders and nonresponders by treatment arm are indicated on the figure. Boxes extend from the first to third quartiles, the middle line shows the median, and the whiskers extend to the most extreme data point that is no more than 1.5 times the IQR from the box. BOR, best overall response; NIVO, nivolumab; NR, nonresponders; R, responders; TMB, tumor mutational burden..... | 18 |
| <b>Supplementary Figure 13.</b> ROC curves illustrating the ability of TMB to predict response in CheckMate 067. AUC, area under the curve; CI, confidence interval; FPF, false positive fraction; IPI, ipilimumab; NIVO, nivolumab; ROC, receiver operating characteristic; TMB, tumor mutational burden; TPF, true positive fraction. ....                                                                                                                                                              | 19 |
| <b>Supplementary Figure 14.</b> ROC curves illustrating the ability of TMB to predict response in CheckMate 066. AUC, area under the curve; CI, confidence interval; FPF, false positive fraction; NIVO, nivolumab; ROC, receiver operating characteristic; TMB, tumor mutational burden; TPF, true positive fraction. ....                                                                                                                                                                               | 20 |
| <b>Supplementary Figure 15.</b> ROC curves illustrating the ability of TMB to predict response by $\geq 5\%$ TC PD-L1 versus $< 5\%$ TC/indeterminate PD-L1 expression in CheckMate 067. AUC, area under the curve; CI, confidence interval; FPF, false positive fraction; IPI, ipilimumab; NIVO, nivolumab; PD-L1, programmed death ligand 1; ROC, receiver operating characteristic; TC, tumor cell; TMB, tumor mutational burden; TPF, true positive fraction. ....                                    | 21 |
| <b>Supplementary Figure 16.</b> ROC curves illustrating the ability of TMB to predict response by $\geq 5\%$ TC PD-L1 versus $< 5\%$ TC/indeterminate PD-L1 expression in CheckMate 066. AUC, area under the curve; CI, confidence interval; FPF, false positive fraction; NIVO, nivolumab; PD-L1, programmed death ligand 1; ROC, receiver operating characteristic; TC, tumor cell; TMB, tumor mutational burden; TPF, true positive fraction. ....                                                     | 22 |

|                                                                                                                                                                                                                                                                                                                                                                                                                                                  |    |
|--------------------------------------------------------------------------------------------------------------------------------------------------------------------------------------------------------------------------------------------------------------------------------------------------------------------------------------------------------------------------------------------------------------------------------------------------|----|
| <b>Supplementary Figure 17.</b> Kaplan–Meier curve for (A) PFS and (B) OS comparing TMB-high (> median) or TMB-low ( $\leq$ median) status patient subgroups in CheckMate 066. HRs (95% CI) for high versus low TMB were obtained with univariate Cox proportional hazards models. CI, confidence interval; HR, hazard ratio; NIVO, nivolumab; OS, overall survival; PFS, progression-free survival; TMB, tumor mutational burden.....           | 23 |
| <b>Supplementary Figure 18.</b> Scatter plot illustrating the distribution of TMB versus tumor % PD-L1 expression for TMB-evaluable and PD-L1–evaluable patients from CheckMate 067 (n = 538). PD-L1, programmed death ligand 1; TC, tumor cell; TMB, tumor mutational burden.....                                                                                                                                                               | 24 |
| <b>Supplementary Figure 19.</b> Distribution of TMB by $\geq$ 5% TC PD-L1 (n = 258) versus < 5% TC/indeterminate PD-L1 (n = 280) expression in CheckMate 067. Boxes extend from the first to third quartiles, the middle line shows the median, and the whiskers extend to the most extreme data point that is no more than 1.5 times the IQR from the box. PD-L1, programmed death ligand 1; TC, tumor cell; TMB, tumor mutational burden. .... | 25 |
| <b>Supplementary Figure 20.</b> Scatter plot illustrating the distribution of TMB versus tumor % PD-L1 expression for TMB-evaluable and PD-L1–evaluable patients from CheckMate 066 (n = 119). PD-L1, programmed death ligand 1; TC, tumor cell; TMB, tumor mutational burden.....                                                                                                                                                               | 26 |
| <b>Supplementary Figure 21.</b> Distribution of TMB by $\geq$ 5% TC PD-L1 (n = 54) versus < 5% TC/indeterminate PD-L1 (n = 65) expression in CheckMate 066. Boxes extend from the first to third quartiles, the middle line shows the median, and the whiskers extend to the most extreme data point that is no more than 1.5 times the IQR from the box. PD-L1, programmed death ligand 1; TC, tumor cell; TMB, tumor mutational burden. ....   | 27 |
| <b>Supplementary Figure 22.</b> Kaplan–Meier curves for PFS by TMB status and metastatic stage in CheckMate 067. HRs (95% CI) for high versus low TMB were obtained with univariate Cox proportional hazards models. CI, confidence interval; HR, hazard ratio; IPI, ipilimumab; NIVO, nivolumab; PFS, progression-free survival; TMB, tumor mutational burden. ....                                                                             | 28 |
| <b>Supplementary Figure 23.</b> Kaplan–Meier curves for OS by TMB status and metastatic stage in CheckMate 067. HRs (95% CI) for high versus low TMB were obtained with univariate Cox proportional hazards models. CI, confidence interval; HR, hazard ratio; IPI, ipilimumab; NIVO, nivolumab; OS, overall survival; TMB, tumor mutational burden.....                                                                                         | 29 |
| <b>Supplementary Figure 24.</b> Kaplan–Meier curves for PFS by TMB status and PD-L1 expression in CheckMate 067. HRs (95% CI) for high versus low TMB were obtained with univariate Cox proportional hazards models. CI, confidence interval; HR, hazard ratio; IPI, ipilimumab; NIVO, nivolumab; PD-L1, programmed death ligand 1; PFS, progression-free survival; TMB, tumor mutational burden. ....                                           | 30 |
| <b>Supplementary Figure 25.</b> Kaplan–Meier curves for OS by TMB status and PD-L1 expression in CheckMate 067. HRs (95% CI) for high versus low TMB were obtained with univariate Cox proportional hazards models. CI, confidence interval;                                                                                                                                                                                                     |    |

HR, hazard ratio; IPI, ipilimumab; NIVO, nivolumab; OS, overall survival; PD-L1, programmed death ligand 1; TMB, tumor mutational burden.....31

**Supplementary Figure 26.** Distribution of TMB for patients with *BRAF*<sup>WT</sup> tumors (n = 359) and *BRAF*<sup>V600</sup> tumors (n = 179) in CheckMate 067. Boxes extend from the first to third quartiles, the middle line shows the median, and the whiskers extend to the most extreme data point that is no more than 1.5 times the IQR from the box. TMB, tumor mutational burden; WT, wild-type. ....32

**Supplementary Figure 27.** Kaplan–Meier curves for PFS by *BRAF* status and by ≥ 5% TC PD-L1 versus < 5% TC/indeterminate PD-L1 expression in CheckMate 067. HRs (95% CI) for PD-L1 negative/indeterminate versus positive were obtained with univariate Cox proportional hazards models. CI, confidence interval; HR, hazard ratio; IPI, ipilimumab; NIVO, nivolumab; PD-L1, programmed death ligand 1; PFS, progression-free survival; TC, tumor cell; WT, wild-type.....33

**Supplementary Figure 28.** Kaplan–Meier curves for OS by *BRAF* status and by ≥ 5% TC PD-L1 versus < 5% TC/indeterminate PD-L1 expression in CheckMate 067. HRs (95% CI) for PD-L1 negative/indeterminate versus positive were obtained with univariate Cox proportional hazards models. CI, confidence interval; HR, hazard ratio; IPI, ipilimumab; NIVO, nivolumab; OS, overall survival; PD-L1, programmed death ligand 1; TC, tumor cell; WT, wild-type.....34

**Supplementary Figure 29.** ROC curves illustrating the ability of the inflammatory signature to predict response in CheckMate 067. AUC, area under the curve; CI, confidence interval; FPF, false positive fraction; IPI, ipilimumab; NIVO, nivolumab; ROC, receiver operating characteristic; TPF, true positive fraction.....35

**Supplementary Figure 30.** Pearson’s correlation analysis of the inflammatory signature with other published inflammation signatures in GEP-evaluable patients (n = 269) from CheckMate 067 (1-3).....36

**Supplementary Figure 31.** Pearson’s correlation analysis of the inflammatory signature versus tumor % PD-L1 expression by IHC in GEP-evaluable patients (n = 269) from CheckMate 067. IHC, immunohistochemistry; PD-L1, programmed death ligand 1; TC, tumor cell. ....37

**Supplementary Figure 32.** Distribution of the inflammatory signature scores for patients with *BRAF*<sup>WT</sup> tumors (n = 196) and *BRAF*<sup>V600</sup> tumors (n = 73) in CheckMate 067. Boxes extend from the first to third quartiles, the middle line shows the median, and the whiskers extend to the most extreme data point that is no more than 1.5 times the IQR from the box. WT, wild-type. ....38

**Supplementary Figure 33.** Distribution of responders and nonresponders by TMB and CD8 expression by IHC in each treatment arm of CheckMate 067. IHC, immunohistochemistry; IPI, ipilimumab; NIVO, nivolumab; NR, nonresponders; R, responders; TMB, tumor mutational burden. ....39

|                                                                                                                                                                                                                                                                                         |    |
|-----------------------------------------------------------------------------------------------------------------------------------------------------------------------------------------------------------------------------------------------------------------------------------------|----|
| <b>Supplementary Figure 34.</b> TMB distribution versus mutation status for candidate genes in TMB-evaluable tumors from CheckMate 067 (n = 538). TMB, tumor mutational burden; WT, wild-type.....                                                                                      | 40 |
| <b>Supplementary Figure 35.</b> Kaplan–Meier curves for PFS and OS comparing patient subgroups with and without stabilizing mutations in $\beta$ -catenin in CheckMate 067. IPI, ipilimumab; NIVO, nivolumab; OS, overall survival; PFS, progression-free survival; WT, wild-type. .... | 41 |
| <b>TABLES</b> .....                                                                                                                                                                                                                                                                     | 42 |
| <b>Supplementary Table 1.</b> Selected patient characteristics for TMB-evaluable and nonevaluable patients in CheckMate 067 .....                                                                                                                                                       | 42 |
| <b>Supplementary Table 2.</b> Selected patient characteristics for TMB-evaluable and nonevaluable patients in CheckMate 066 .....                                                                                                                                                       | 43 |
| <b>Supplementary Table 3.</b> Selected patient characteristics for GEP-evaluable and nonevaluable patients in CheckMate 067 .....                                                                                                                                                       | 44 |
| <b>Supplementary Table 4.</b> ORR for TMB-evaluable and nonevaluable patients by treatment arm in CheckMate 067 .....                                                                                                                                                                   | 45 |
| <b>Supplementary Table 5.</b> ORR for TMB-evaluable and nonevaluable patients by initial treatment in CheckMate 066 .....                                                                                                                                                               | 46 |
| <b>Supplementary Table 6.</b> ORR for GEP-evaluable and nonevaluable patients in CheckMate 067 .....                                                                                                                                                                                    | 47 |
| <b>Supplementary Table 7.</b> ORR by TMB status in CheckMate 066 .....                                                                                                                                                                                                                  | 48 |
| <b>Supplementary Table 8.</b> ORR for TMB-high versus TMB-low by arm and PD-L1 $\geq$ 5% TC PD-L1 versus < 5% TC/indeterminate PD-L1 expression in CheckMate 067.....                                                                                                                   | 49 |
| <b>Supplementary Table 9.</b> ORR for TMB-high versus TMB-low by arm and PD-L1 $\geq$ 5% TC PD-L1 versus < 5% TC/indeterminate PD-L1 expression in CheckMate 066.....                                                                                                                   | 50 |
| <b>Supplementary Table 10.</b> PFS and OS HRs for TMB-high versus TMB-low by arm and metastatic stage in CheckMate 067 .....                                                                                                                                                            | 51 |
| <b>Supplementary Table 11.</b> ORR by PD-L1 expression ( $\geq$ 5% TC PD-L1 versus < 5% TC/indeterminate PD-L1 expression), <i>BRAF</i> mutation status, and arm in CheckMate 067 .....                                                                                                 | 52 |
| <b>Supplementary Table 12.</b> ORR by inflammatory signature score status in CheckMate 067 .....                                                                                                                                                                                        | 53 |
| <b>Supplementary Table 13.</b> ORR by TMB and inflammatory signature score status in CheckMate 067.....                                                                                                                                                                                 | 54 |
| <b>Supplementary Table 14.</b> ORR by TMB and CD8 expression status in CheckMate 067 .....                                                                                                                                                                                              | 55 |

|                                                                                                                                                        |    |
|--------------------------------------------------------------------------------------------------------------------------------------------------------|----|
| <b>Supplementary Table 15.</b> Genes assessed in tumor mutation analysis of WES-evaluable patients in CheckMate 067 ...                                | 56 |
| <b>Supplementary Table 16.</b> ORR by pathway-level mutation status of tumors for CheckMate 067 .....                                                  | 57 |
| <b>Supplementary Table 17.</b> Response in patients with stabilizing mutations in $\beta$ -catenin in CheckMate 067 .....                              | 58 |
| <b>Supplementary Table 18.</b> Response in patients with stabilizing mutations in genes of the WNT- $\beta$ -catenin pathway in<br>CheckMate 067 ..... | 59 |
| <b>References</b> .....                                                                                                                                | 60 |

# FIGURES

Supplementary Figure 1. CONSORT diagram for CheckMate 067.

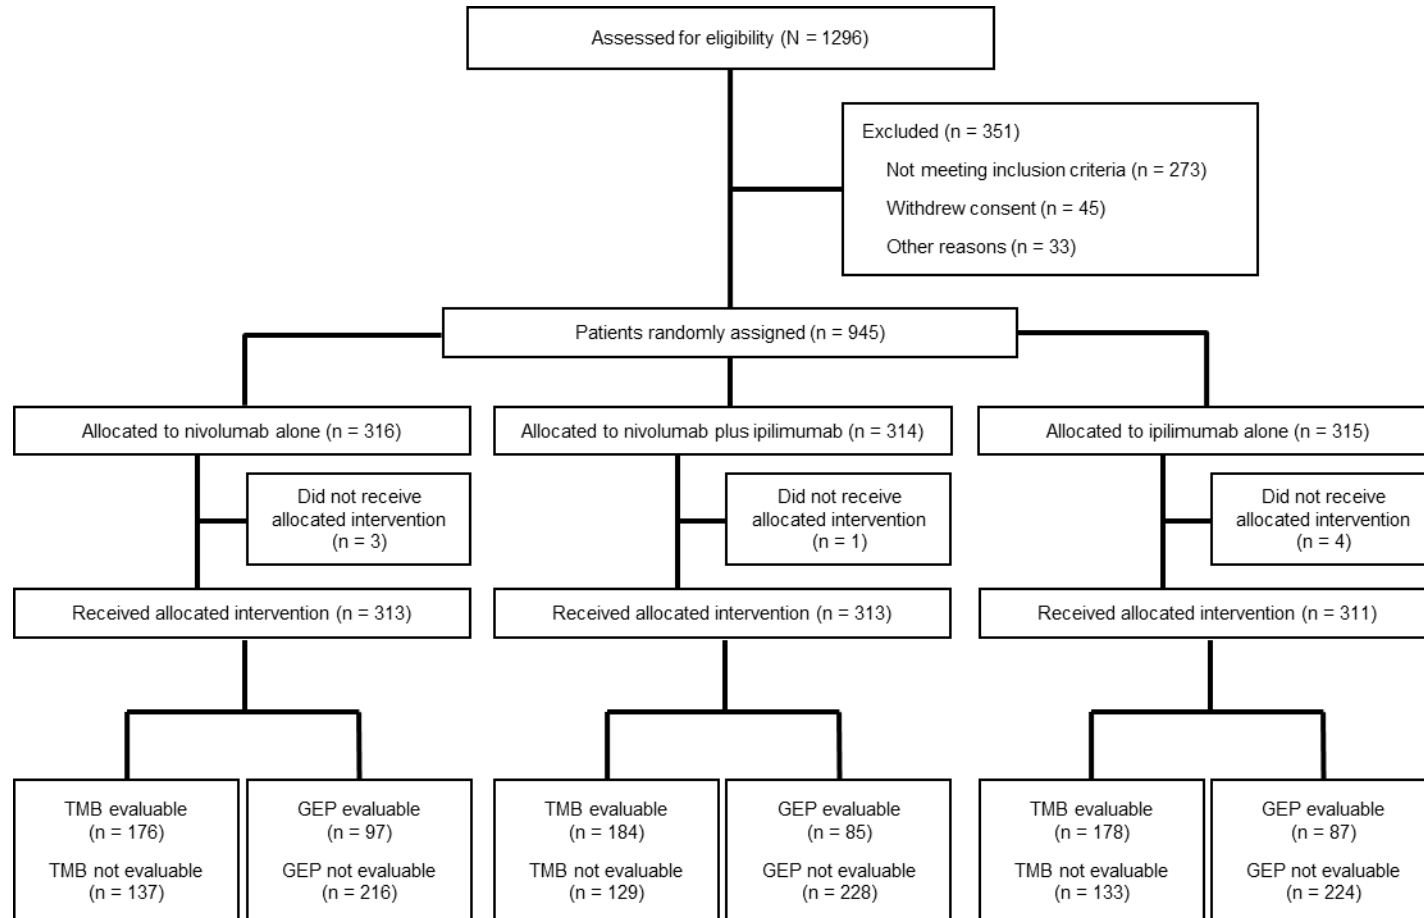

Supplementary Figure 2. CONSORT diagram for CheckMate 066.

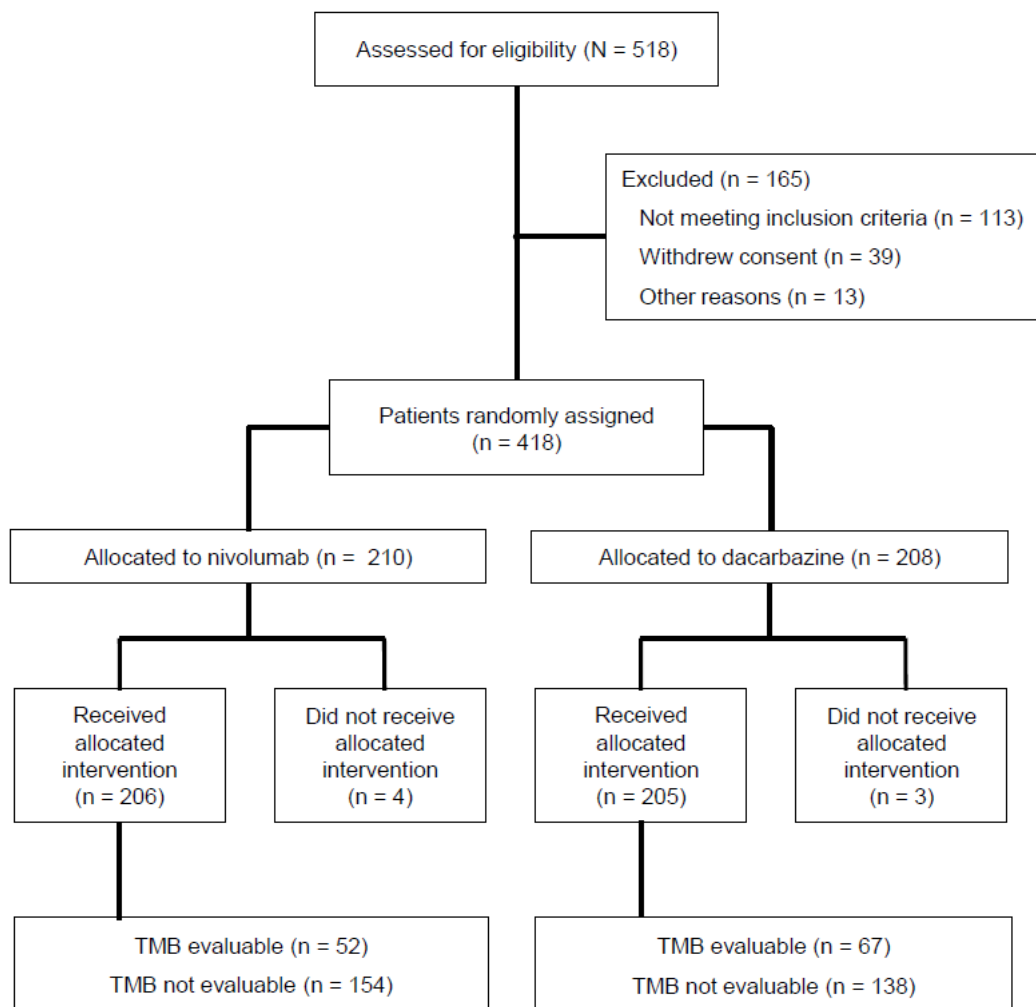



**Supplementary Figure 3.** TMB for TMB-evaluable patients in the NIVO (n = 176), NIVO+IPI (n = 184), and IPI (n = 178) arms of CheckMate 067. The median TMB for all evaluable patients was 203.5. Boxes extend from the first to third quartiles, the middle line shows the median, and the whiskers extend to the most extreme data point that is no more than 1.5 times the IQR from the box. IPI, ipilimumab; NIVO, nivolumab; TMB, tumor mutational burden.

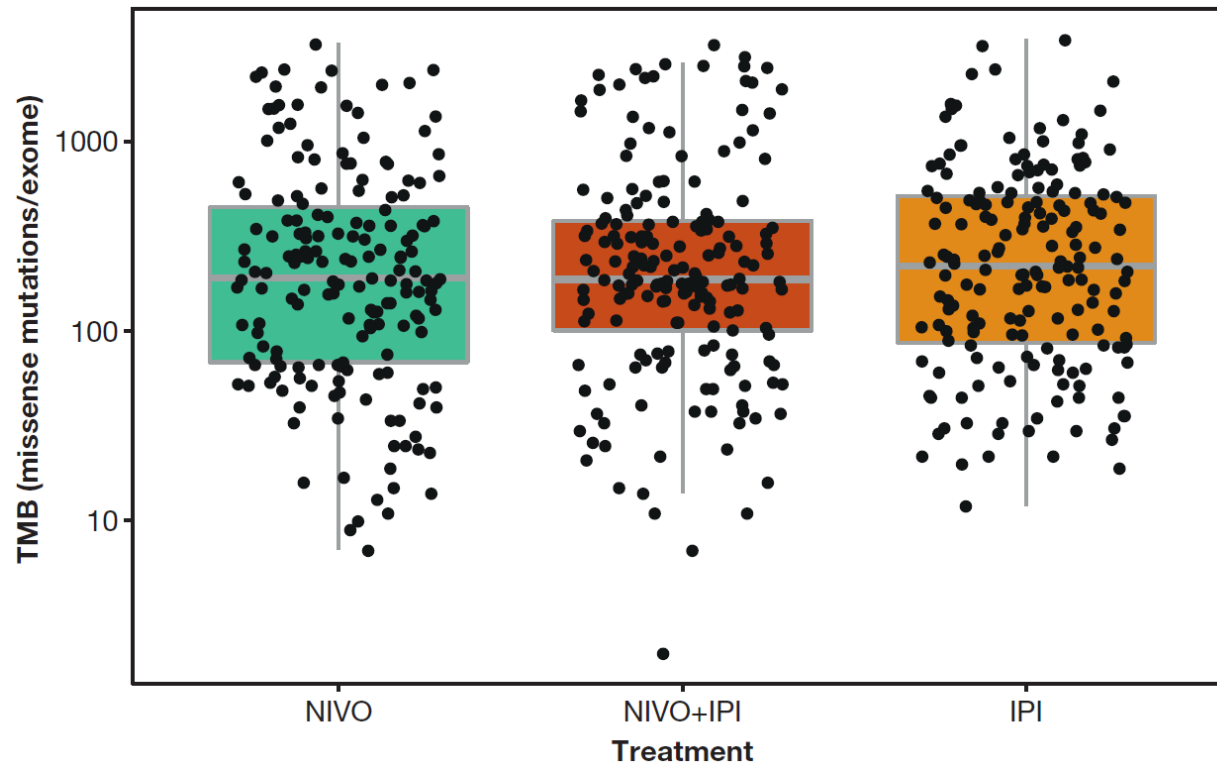

| Treatment | Q1    | Median | Q3    |
|-----------|-------|--------|-------|
| NIVO      | 68.5  | 191.0  | 449.8 |
| NIVO+IPI  | 100.8 | 187.5  | 382.0 |
| IPI       | 87.0  | 220.5  | 515.5 |

**Supplementary Figure 4.** TMB for TMB-evaluable patients in the NIVO (n = 52) and dacarbazine (n = 67) treatment arms of CheckMate 066. Dashed line represents the study median TMB value. The median TMB value for all evaluable patients was 157.0. Boxes extend from the first to third quartiles, the middle line shows the median, and the whiskers extend to the most extreme data point that is no more than 1.5 times the IQR from the box. NIVO, nivolumab; TMB, tumor mutational burden.

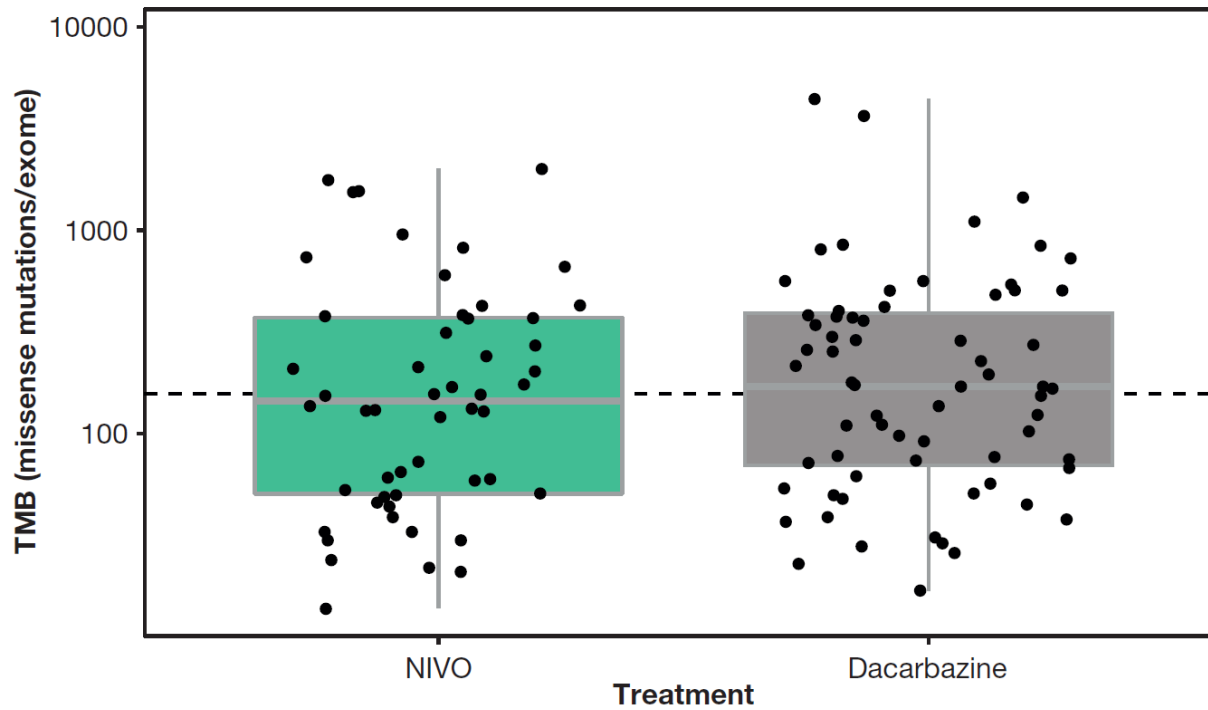

| Treatment   | Q1   | Median | Q3    |
|-------------|------|--------|-------|
| NIVO        | 50.8 | 145.5  | 373.0 |
| Dacarbazine | 70.0 | 171.0  | 392.5 |

**Supplementary Figure 5.** Distribution of inflammatory signature scores in the NIVO (n = 97), NIVO + IPI (n = 85), and IPI (n = 87) treatment arms of CheckMate 067. The median baseline inflammatory signature score for all evaluable patients was -0.04. Boxes extend from the first to third quartiles, the middle line shows the median, and the whiskers extend to the most extreme data point that is no more than 1.5 times the IQR from the box. IPI, ipilimumab; NIVO, nivolumab.

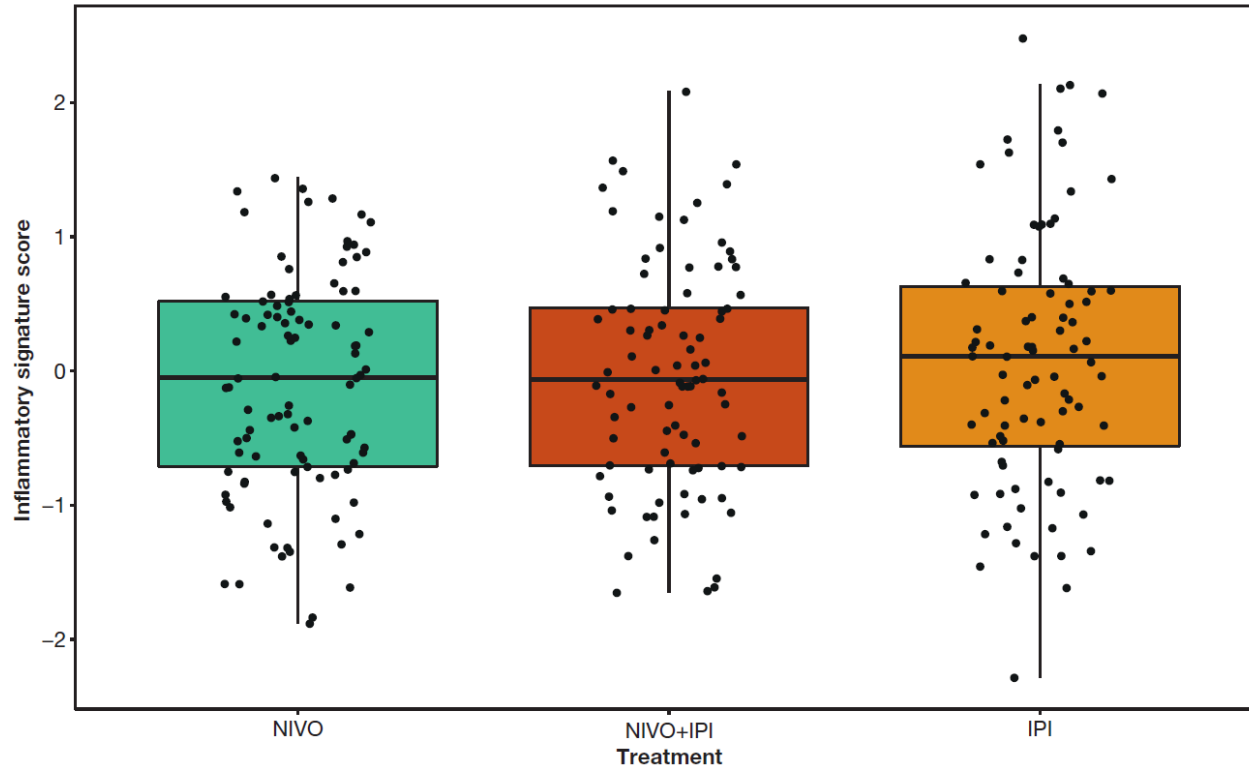

| Treatment | Q1    | Median | Q3   |
|-----------|-------|--------|------|
| NIVO      | -0.71 | -0.05  | 0.52 |
| NIVO+IPI  | -0.70 | -0.06  | 0.47 |
| IPI       | -0.56 | -0.11  | 0.63 |

**Supplementary Figure 6.** Kaplan–Meier curves for PFS versus TMB availability by treatment arm for CheckMate 067. HRs (95% CI) for TMB evaluable versus non-evaluable were obtained with univariate Cox proportional hazards models. CI, confidence interval; HR, hazard ratio; IPI, ipilimumab; NIVO, nivolumab; PFS, progression-free survival; TMB, tumor mutational burden.

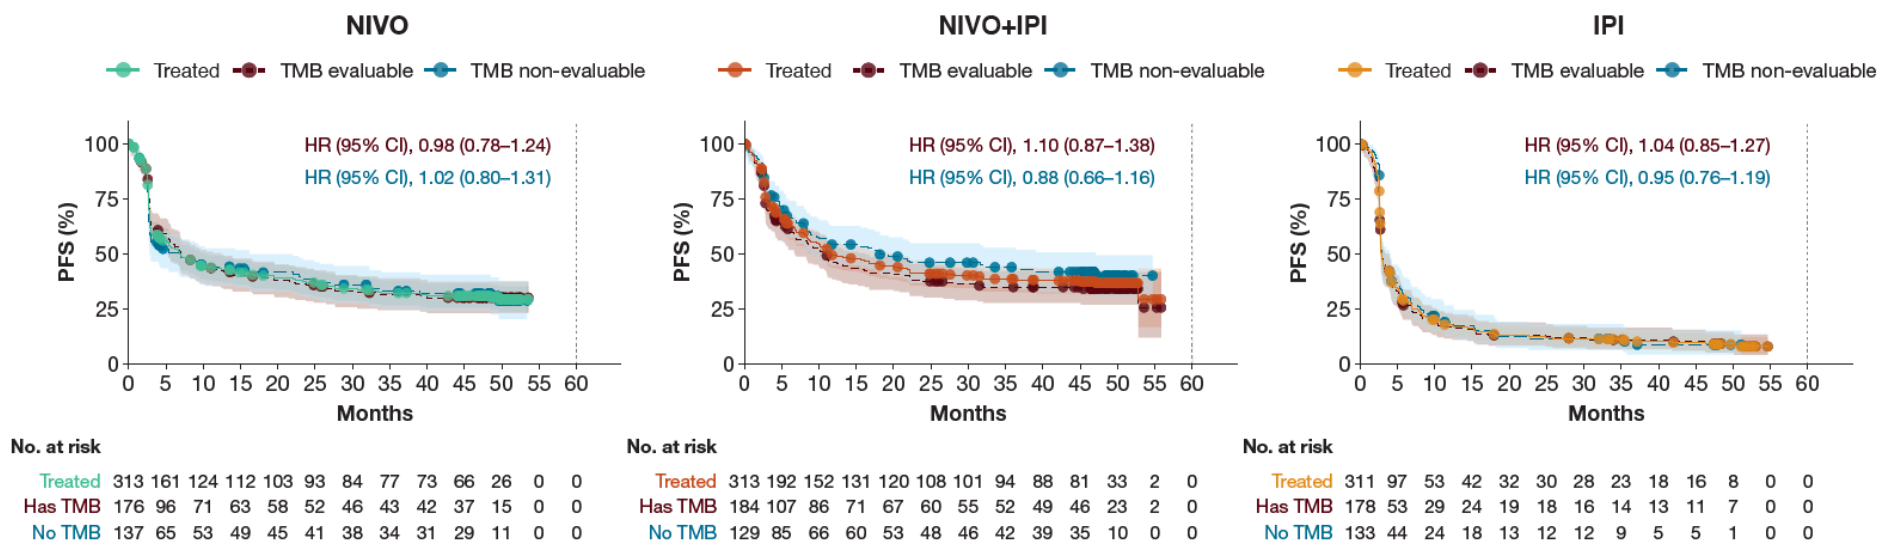

**Supplementary Figure 7.** Kaplan–Meier curves for OS versus TMB availability by treatment arm for CheckMate 067. HRs (95% CI) for TMB evaluable versus non-evaluable were obtained with univariate Cox proportional hazards models. CI, confidence interval; HR, hazard ratio; IPI, ipilimumab; NIVO, nivolumab; OS, overall survival; TMB, tumor mutational burden.

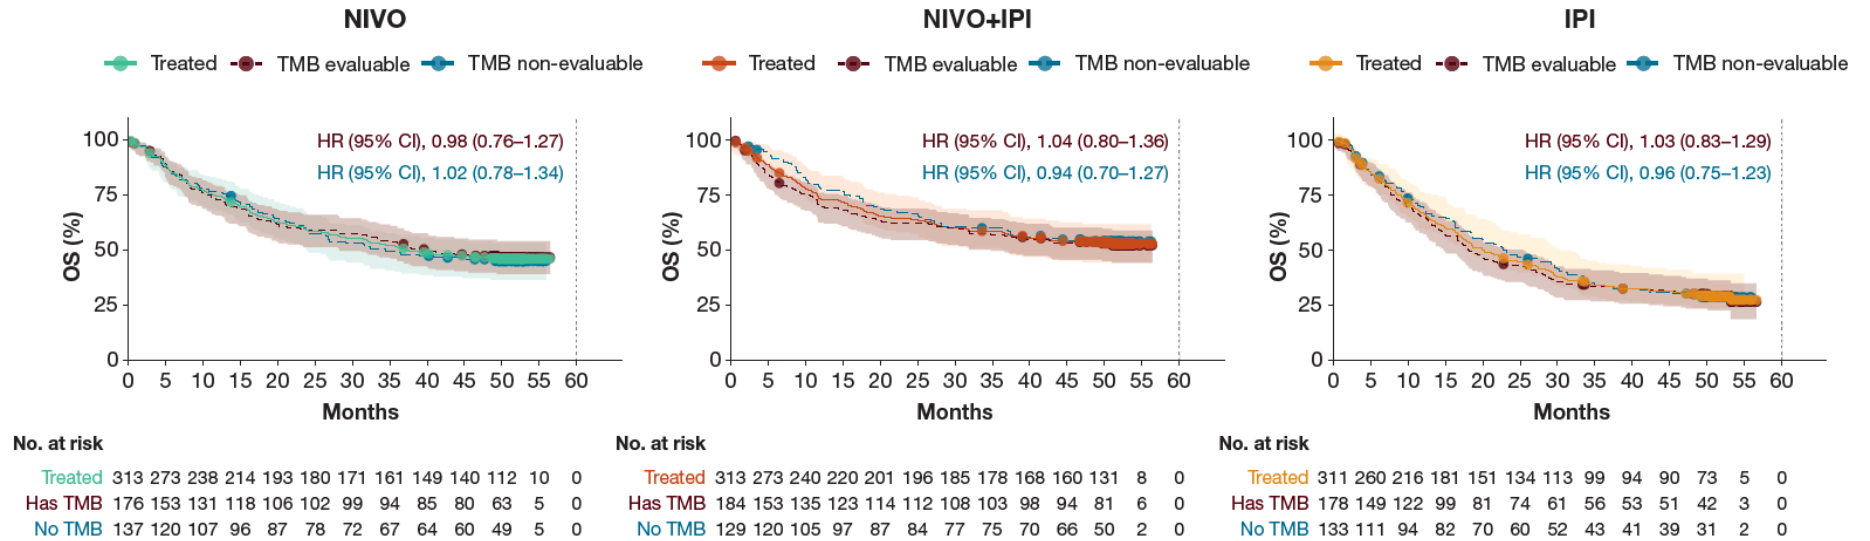

**Supplementary Figure 8.** Kaplan–Meier curves for PFS versus TMB availability by initial treatment for CheckMate 066. HRs (95% CI) for TMB evaluable versus non-evaluable were obtained with univariate Cox proportional hazards models. CI, confidence interval; HR, hazard ratio; NIVO, nivolumab; PFS, progression-free survival; TMB, tumor mutational burden.

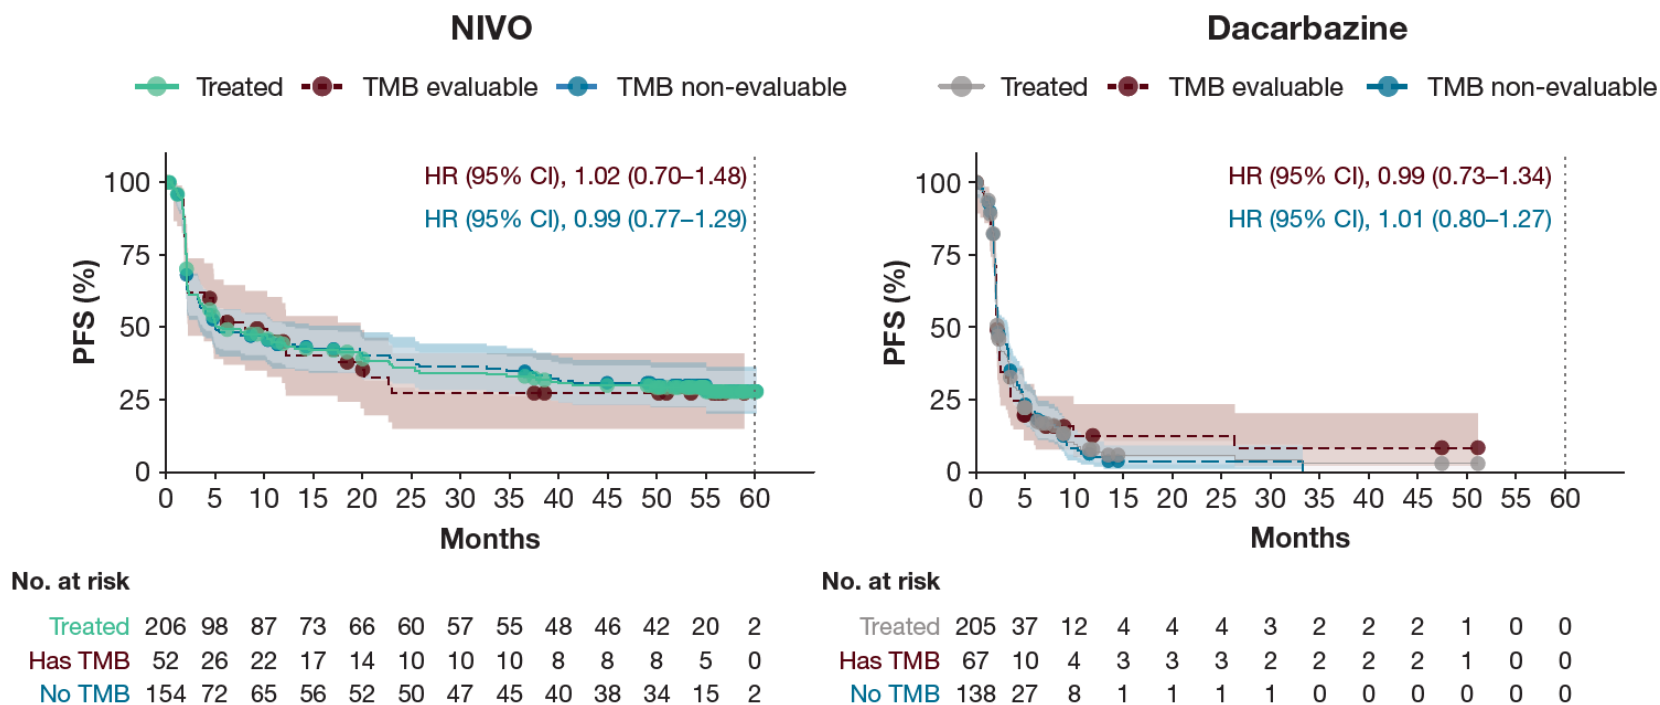

**Supplementary Figure 9.** Kaplan–Meier curves for OS versus TMB availability by initial treatment for CheckMate 066. HRs (95% CI) for TMB evaluable versus non-evaluable were obtained with univariate Cox proportional hazards models. CI, confidence interval; HR, hazard ratio; NIVO, nivolumab; OS, overall survival; TMB, tumor mutational burden.

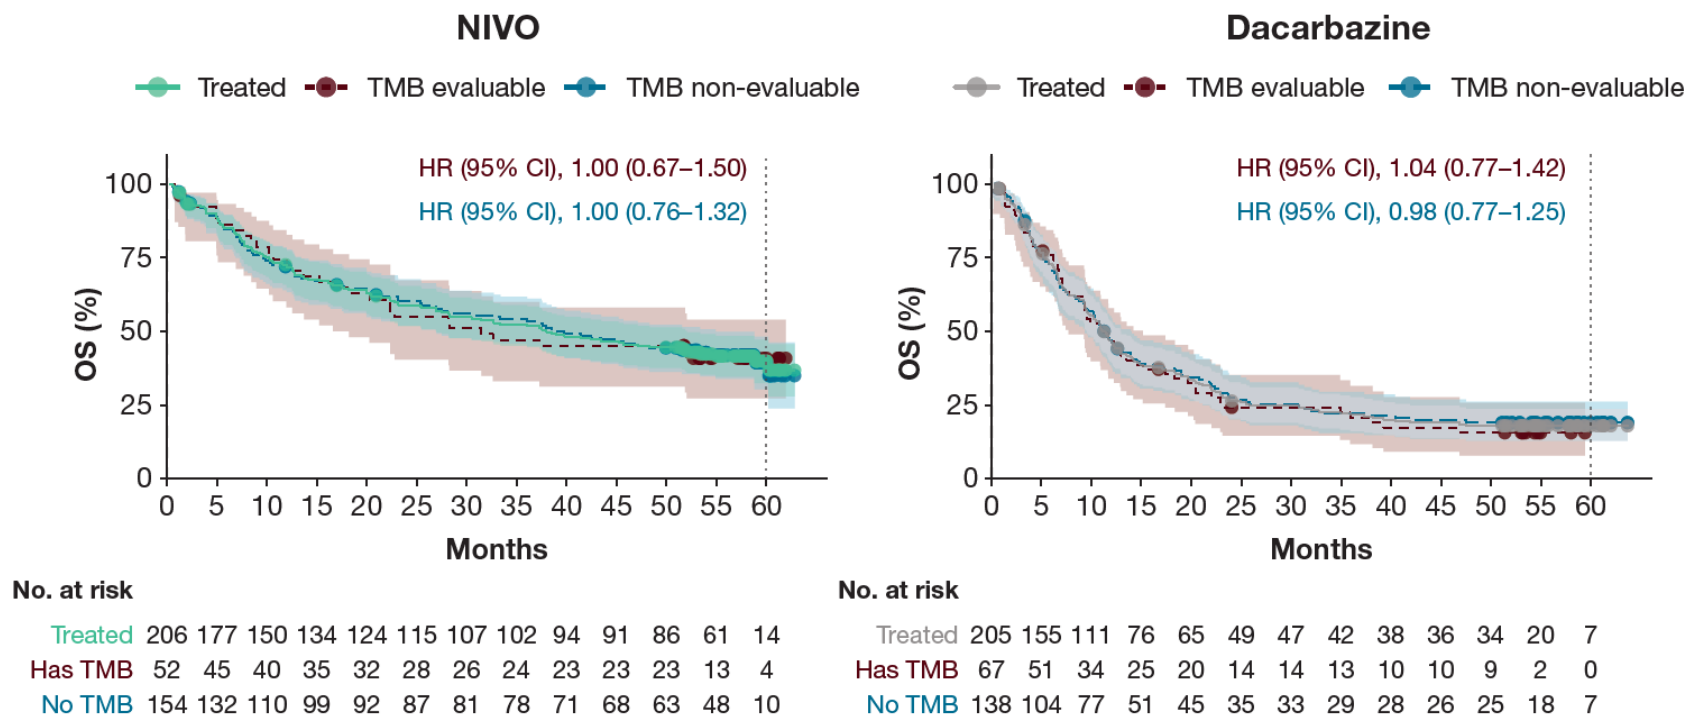

**Supplementary Figure 10.** Kaplan–Meier curves for PFS versus inflammatory signature score availability by treatment arm for CheckMate 067. HRs (95% CI) for GEP evaluable versus non-evaluable were obtained with univariate Cox proportional hazards models. CI, confidence interval; GEP, gene expression profiling; HR, hazard ratio; IPI, ipilimumab; NIVO, nivolumab; PFS, progression-free survival.

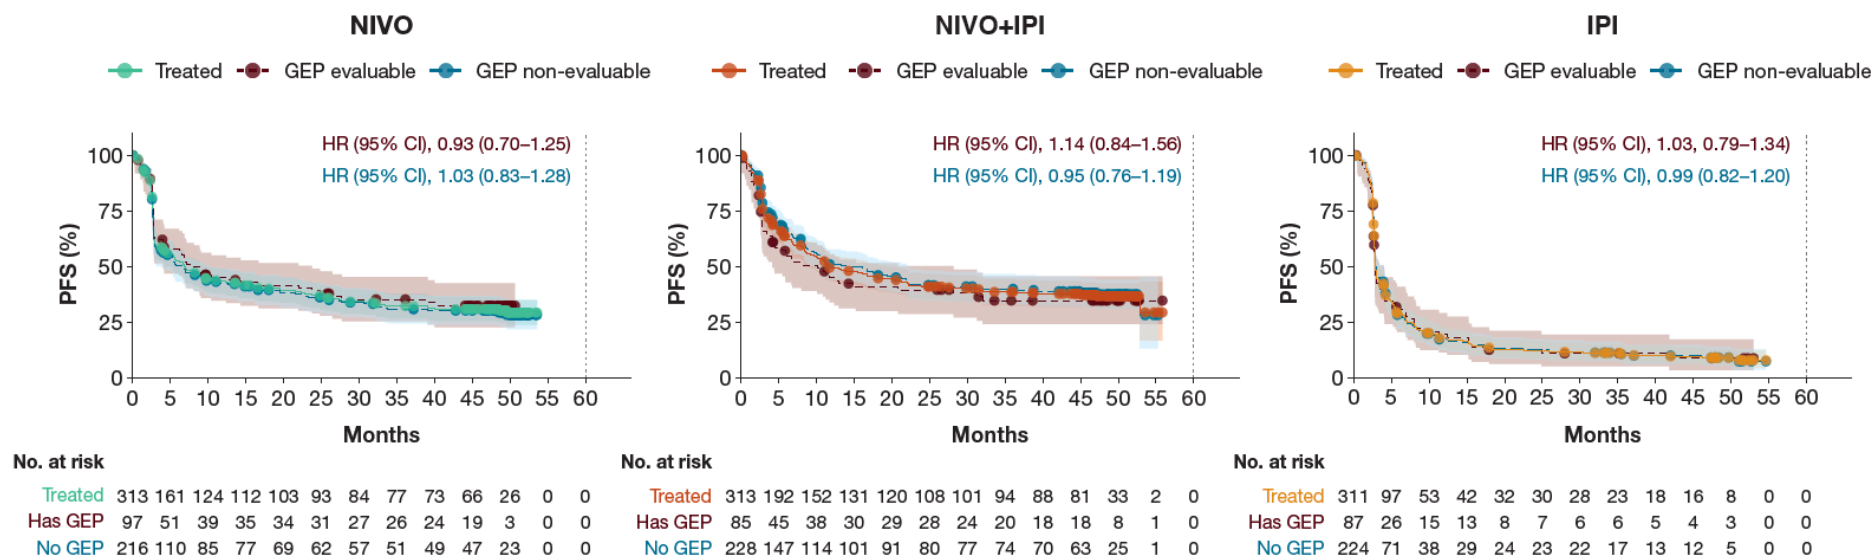



**Supplementary Figure 11.** Kaplan–Meier curves for OS versus inflammatory signature score availability by treatment arm for CheckMate 067. HRs (95% CI) for GEP evaluable versus non-evaluable were obtained with univariate Cox proportional hazards models. CI, confidence interval; GEP, gene expression profiling; HR, hazard ratio; IPI, ipilimumab; NIVO, nivolumab; OS, overall survival.

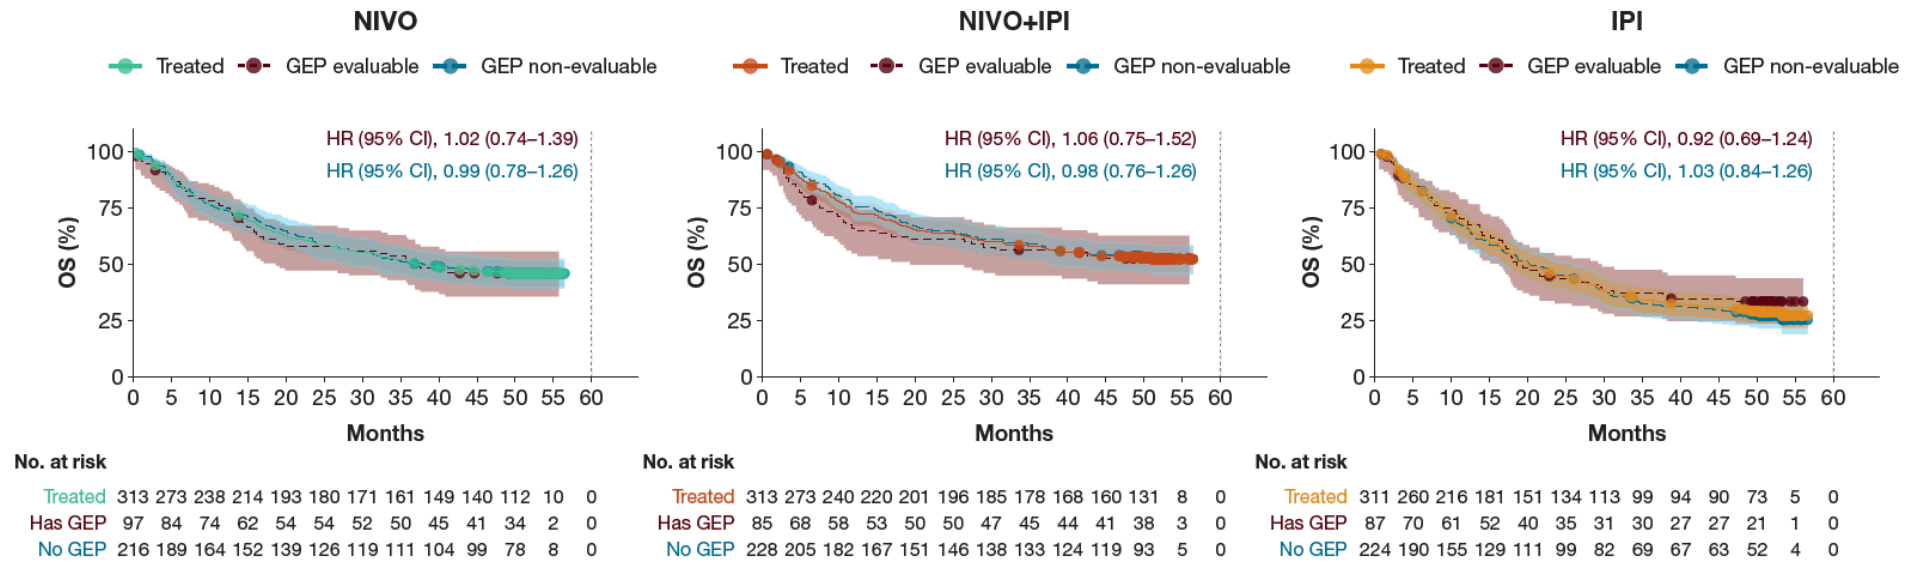

**Supplementary Figure 12.** Distribution of TMB by BOR with NIVO or dacarbazine in CheckMate 066. Number of responders and nonresponders by treatment arm are indicated on the figure. Boxes extend from the first to third quartiles, the middle line shows the median, and the whiskers extend to the most extreme data point that is no more than 1.5 times the IQR from the box. BOR, best overall response; NIVO, nivolumab; NR, nonresponders; R, responders; TMB, tumor mutational burden.

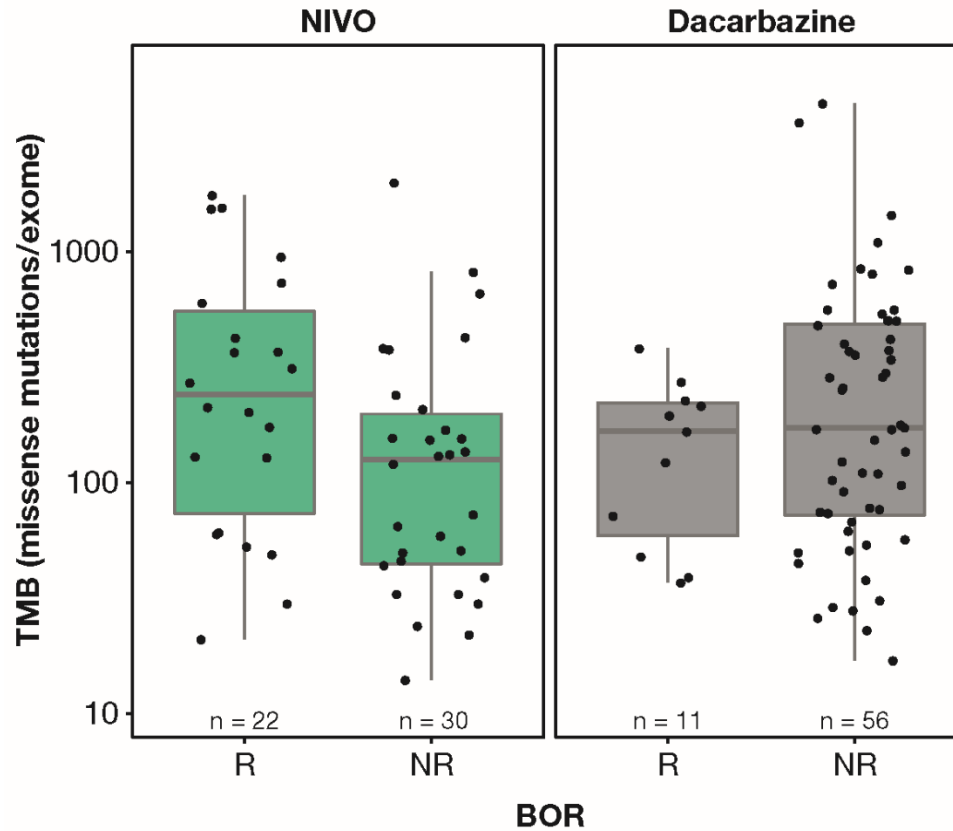

**Supplementary Figure 13.** ROC curves illustrating the ability of TMB to predict response in CheckMate 067. AUC, area under the curve; CI, confidence interval; FPF, false positive fraction; IPI, ipilimumab; NIVO, nivolumab; ROC, receiver operating characteristic; TMB, tumor mutational burden; TPF, true positive fraction.

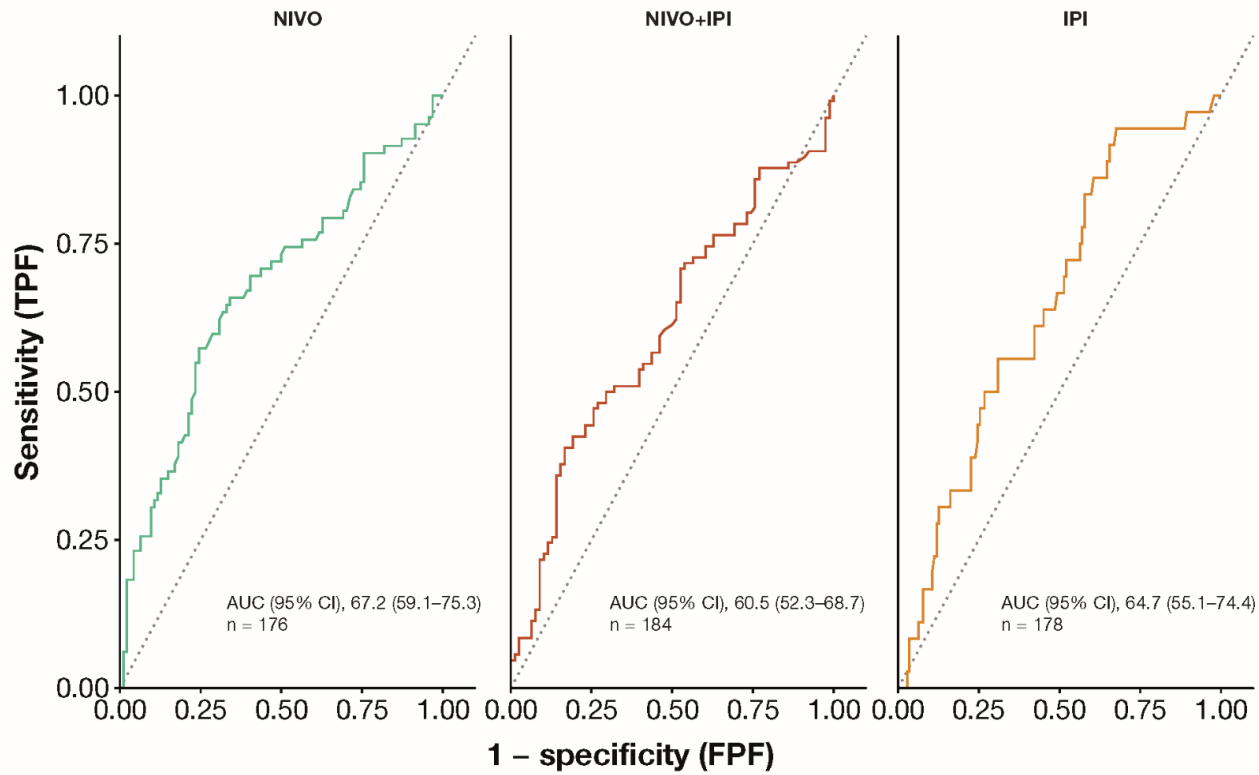

**Supplementary Figure 14.** ROC curves illustrating the ability of TMB to predict response in CheckMate 066. AUC, area under the curve; CI, confidence interval; FPF, false positive fraction; NIVO, nivolumab; ROC, receiver operating characteristic; TMB, tumor mutational burden; TPF, true positive fraction.

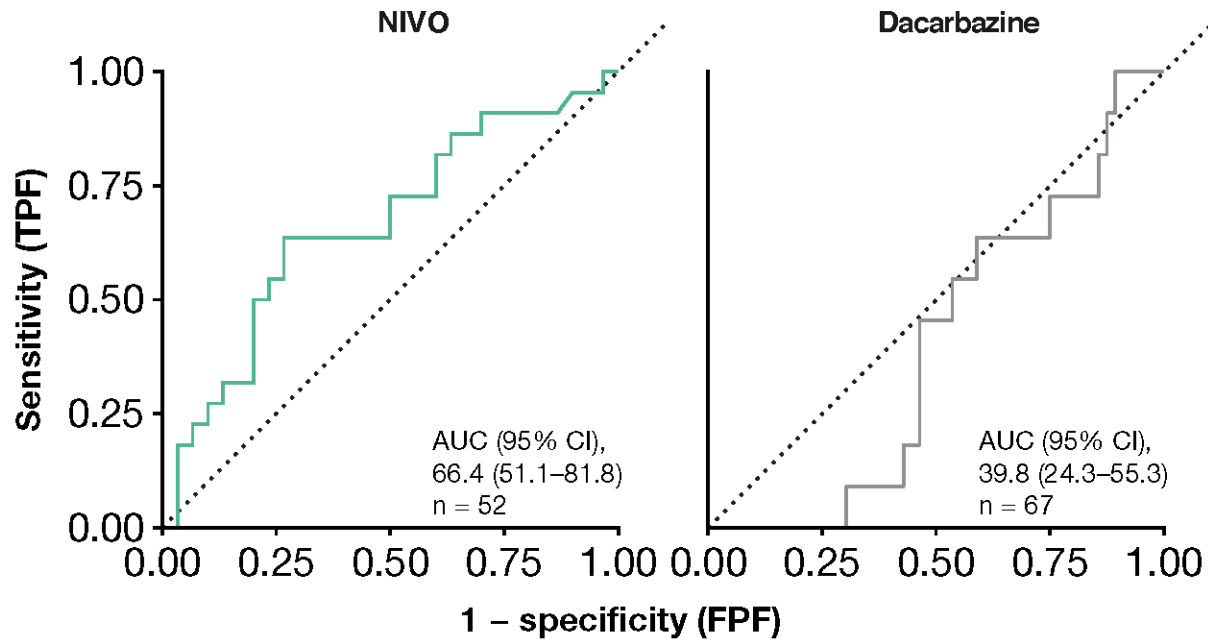

**Supplementary Figure 15.** ROC curves illustrating the ability of TMB to predict response by  $\geq 5\%$  TC PD-L1 versus  $< 5\%$  TC/indeterminate PD-L1 expression in CheckMate 067. AUC, area under the curve; CI, confidence interval; FPF, false positive fraction; IPI, ipilimumab; NIVO, nivolumab; PD-L1, programmed death ligand 1; ROC, receiver operating characteristic; TC, tumor cell; TMB, tumor mutational burden; TPF, true positive fraction.

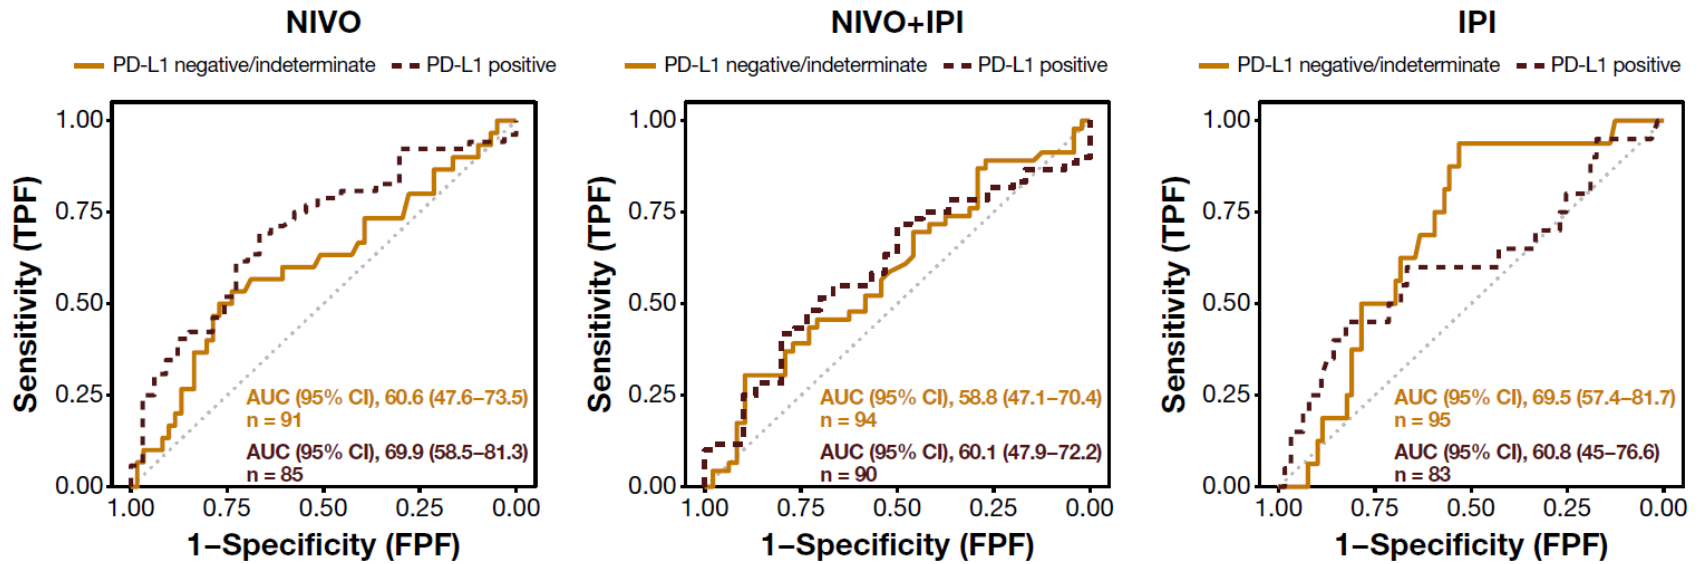

**Supplementary Figure 16.** ROC curves illustrating the ability of TMB to predict response by  $\geq 5\%$  TC PD-L1 versus  $< 5\%$  TC/indeterminate PD-L1 expression in CheckMate 066. AUC, area under the curve; CI, confidence interval; FPF, false positive fraction; NIVO, nivolumab; PD-L1, programmed death ligand 1; ROC, receiver operating characteristic; TC, tumor cell; TMB, tumor mutational burden; TPF, true positive fraction.

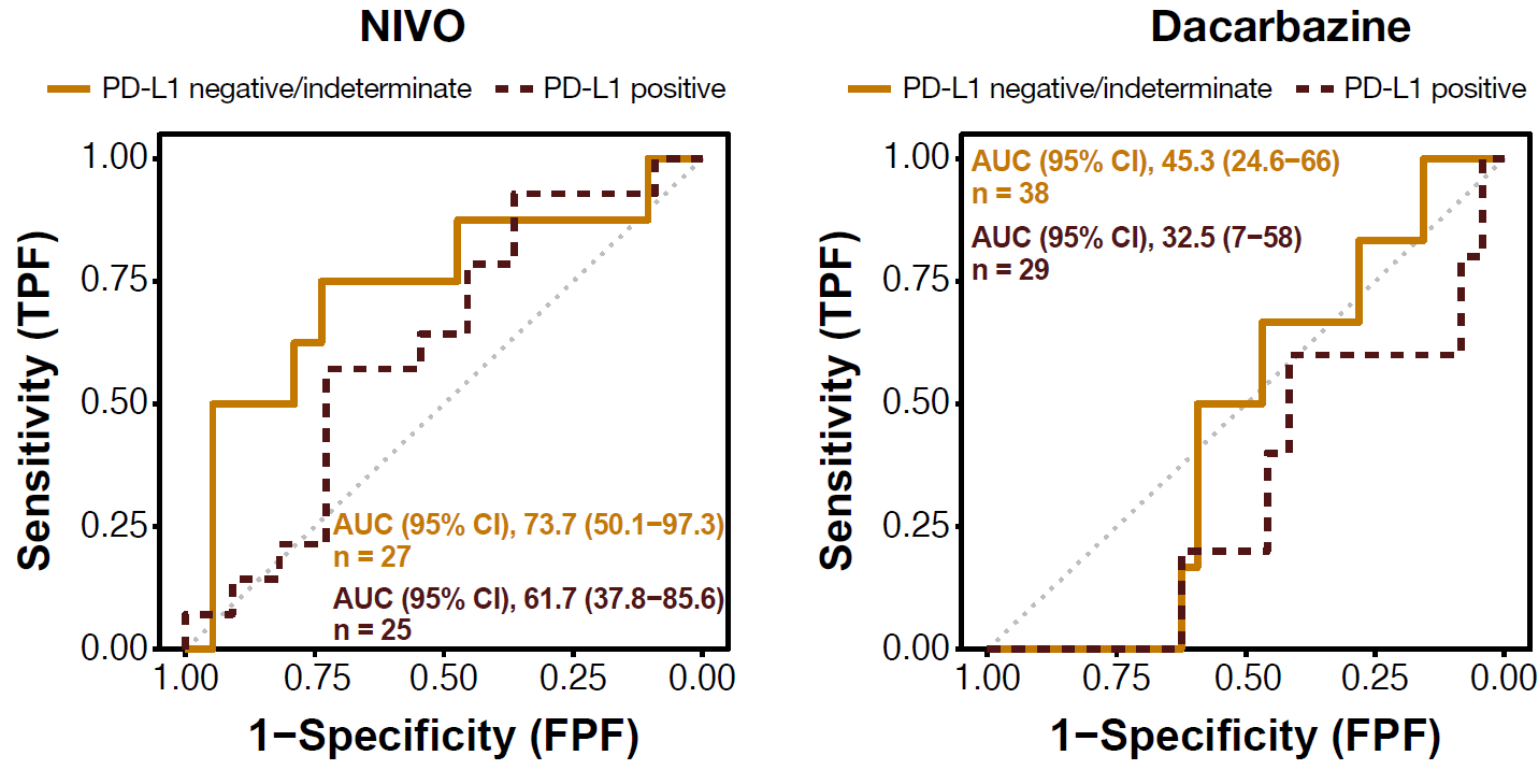

**Supplementary Figure 17.** Kaplan–Meier curve for (A) PFS and (B) OS comparing TMB-high (> median) or TMB-low ( $\leq$  median) status patient subgroups in CheckMate 066. HRs (95% CI) for high versus low TMB were obtained with univariate Cox proportional hazards models. CI, confidence interval; HR, hazard ratio; NIVO, nivolumab; OS, overall survival; PFS, progression-free survival; TMB, tumor mutational burden.

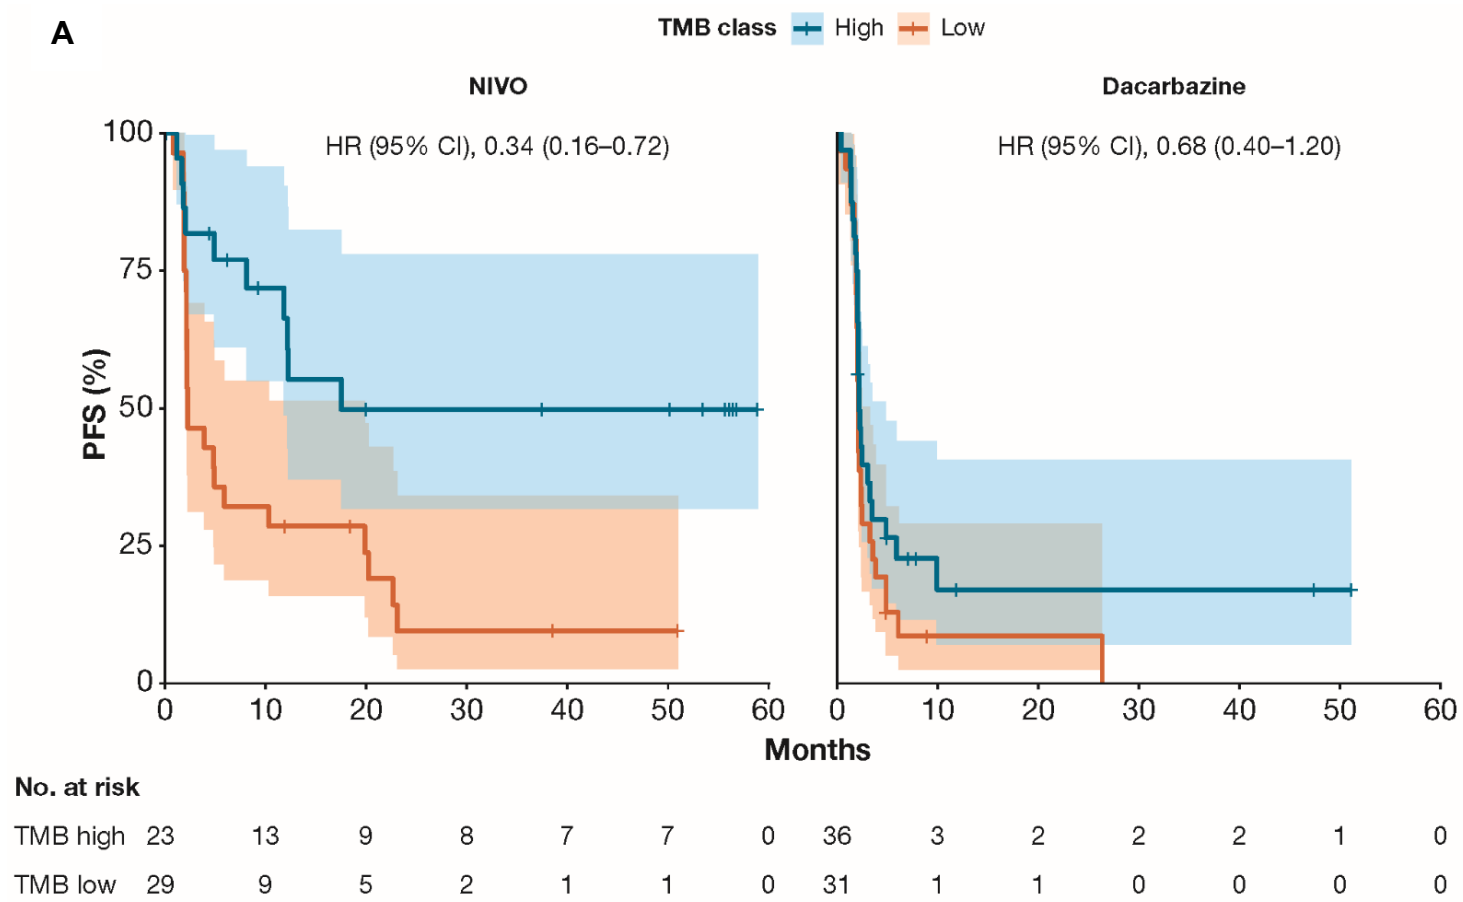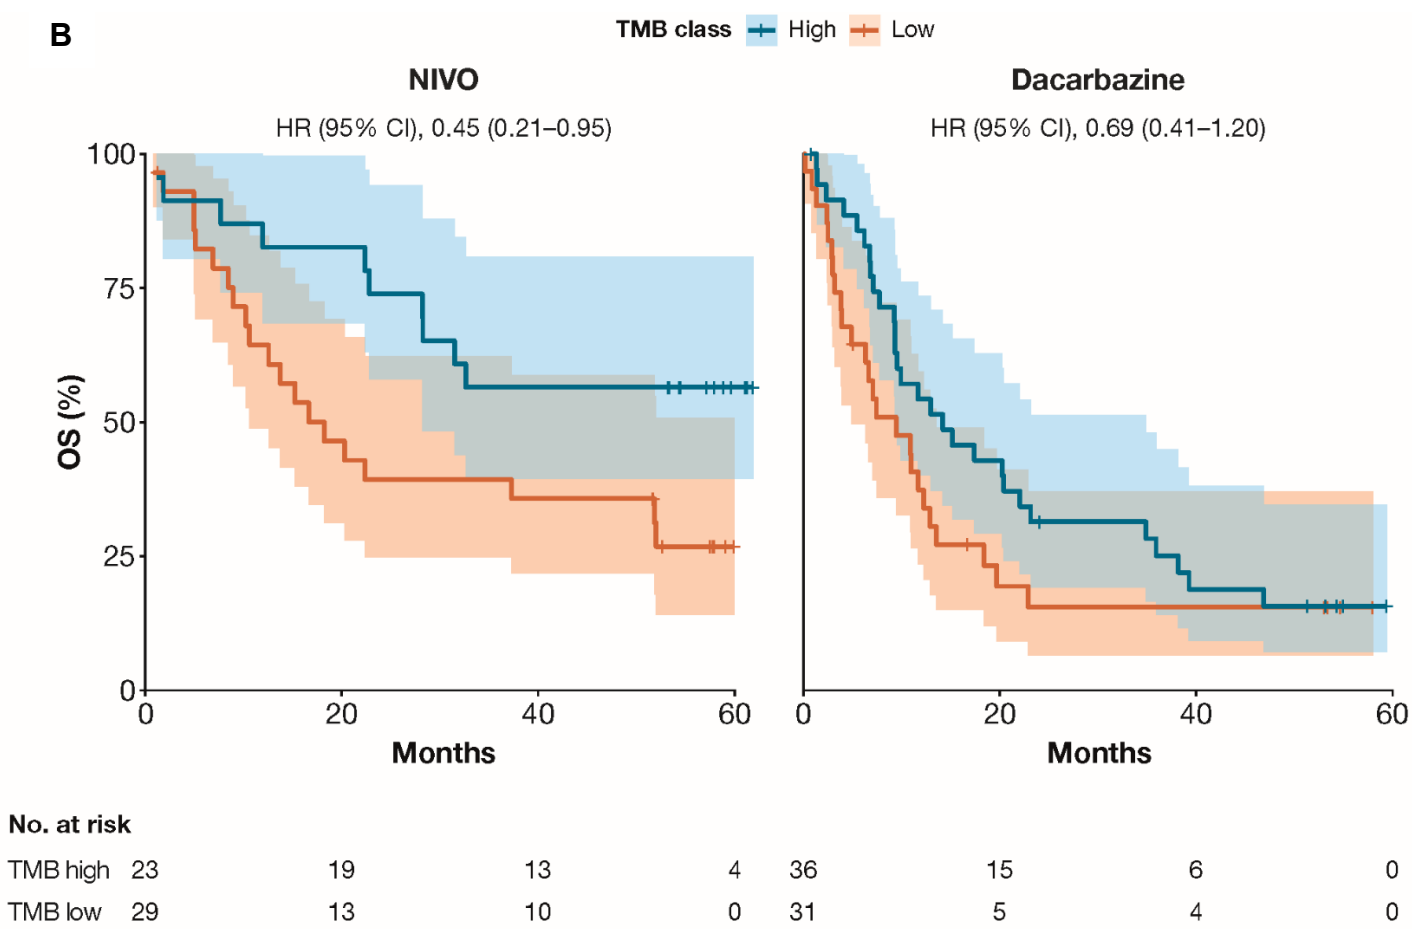

**Supplementary Figure 18.** Scatter plot illustrating the distribution of TMB versus tumor % PD-L1 expression for TMB-evaluable and PD-L1-evaluable patients from CheckMate 067 (n = 538). PD-L1, programmed death ligand 1; TC, tumor cell; TMB, tumor mutational burden.

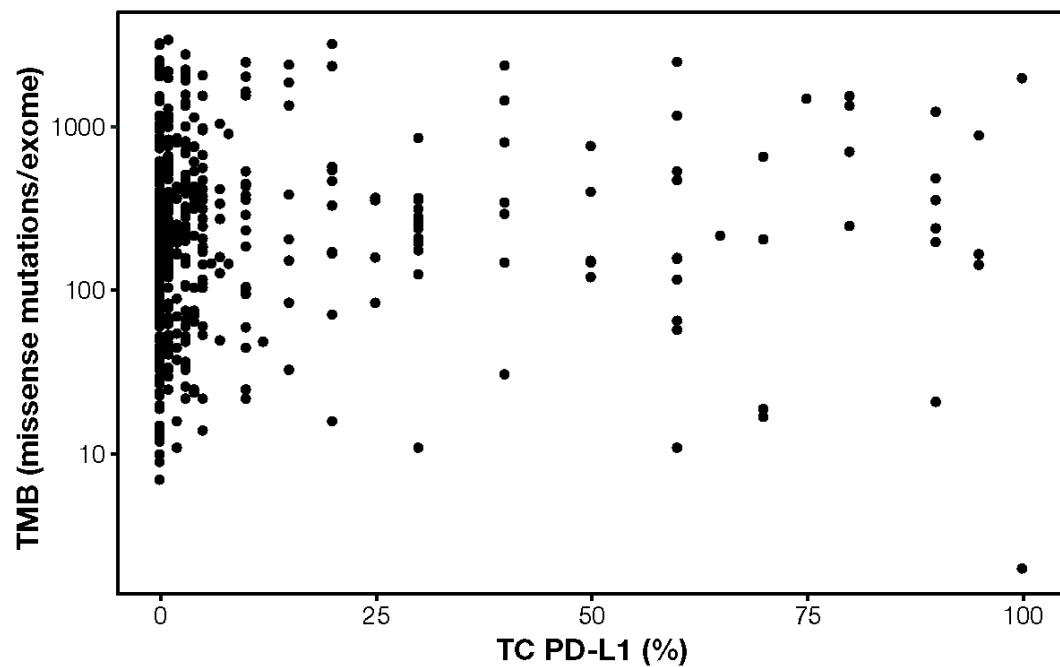



**Supplementary Figure 19.** Distribution of TMB by  $\geq 5\%$  TC PD-L1 (n = 258) versus  $< 5\%$  TC/indeterminate PD-L1 (n = 280) expression in CheckMate 067. Boxes extend from the first to third quartiles, the middle line shows the median, and the whiskers extend to the most extreme data point that is no more than 1.5 times the IQR from the box. PD-L1, programmed death ligand 1; TC, tumor cell; TMB, tumor mutational burden.

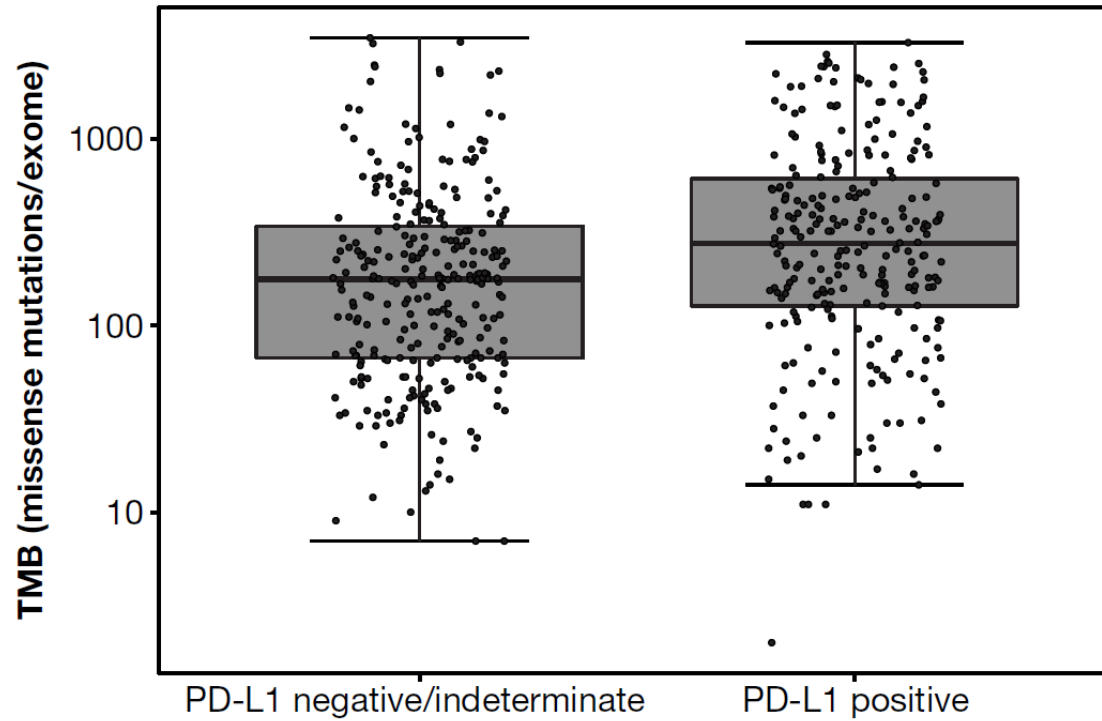

| PD-L1                  | Q1    | Median | Q3    |
|------------------------|-------|--------|-------|
| Negative/indeterminate | 67.0  | 177.0  | 340.3 |
| Positive               | 127.3 | 275.0  | 611.3 |

**Supplementary Figure 20.** Scatter plot illustrating the distribution of TMB versus tumor % PD-L1 expression for TMB-evaluable and PD-L1-evaluable patients from CheckMate 066 (n = 119). PD-L1, programmed death ligand 1; TC, tumor cell; TMB, tumor mutational burden.

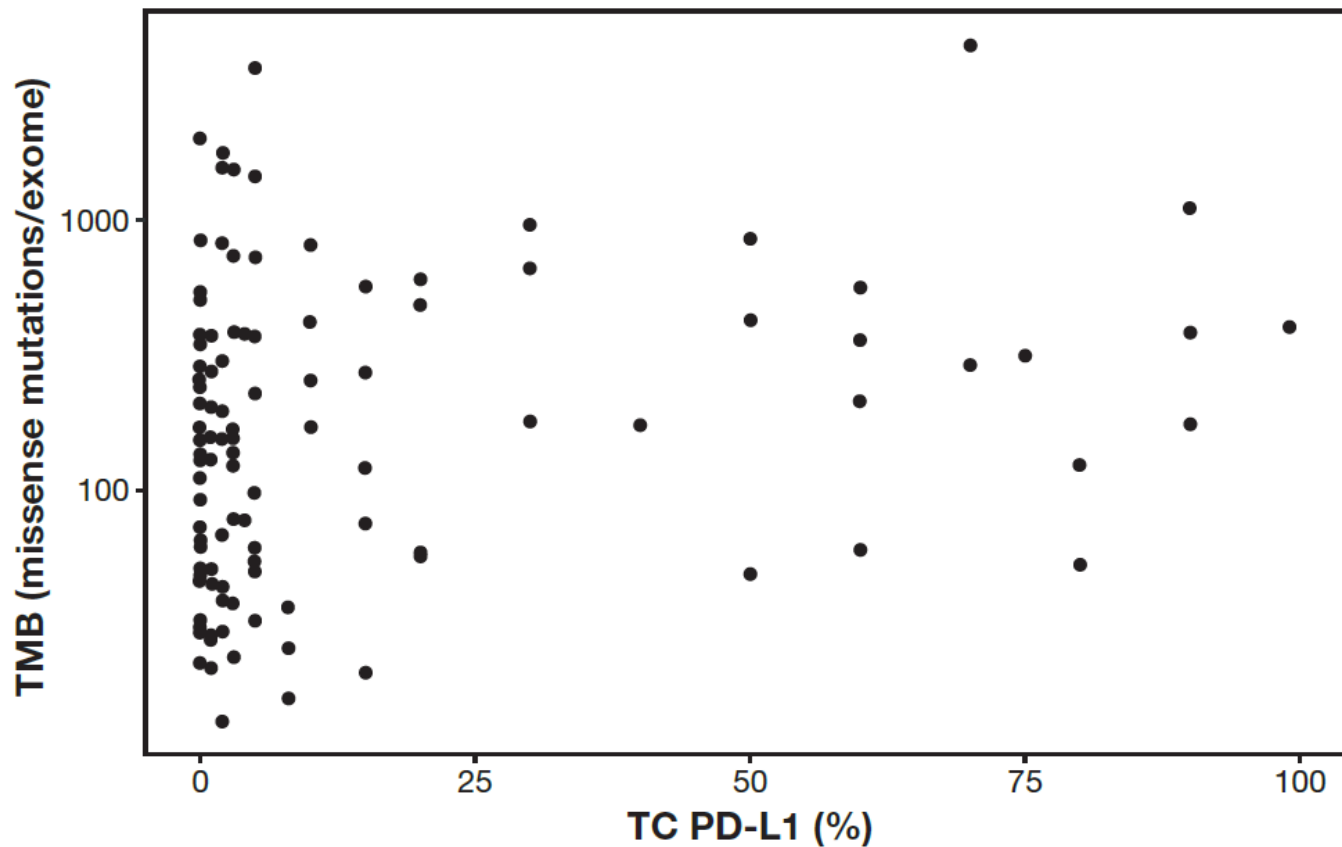

**Supplementary Figure 21.** Distribution of TMB by  $\geq 5\%$  TC PD-L1 (n = 54) versus  $< 5\%$  TC/indeterminate PD-L1 (n = 65) expression in CheckMate 066. Boxes extend from the first to third quartiles, the middle line shows the median, and the whiskers extend to the most extreme data point that is no more than 1.5 times the IQR from the box. PD-L1, programmed death ligand 1; TC, tumor cell; TMB, tumor mutational burden.

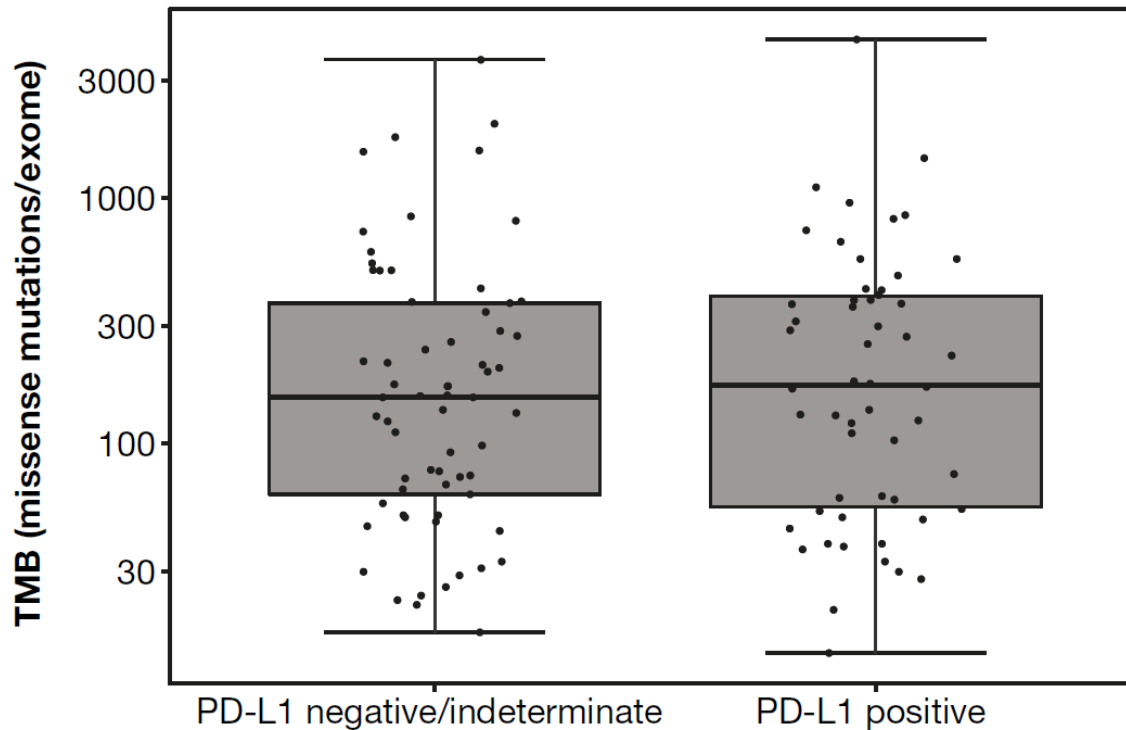

| PD-L1                  | Q1   | Median | Q3    |
|------------------------|------|--------|-------|
| Negative/indeterminate | 62.0 | 154.0  | 373.0 |
| Positive               | 55.3 | 172.5  | 397.5 |

**Supplementary Figure 22.** Kaplan–Meier curves for PFS by TMB status and metastatic stage in CheckMate 067. HRs (95% CI) for high versus low TMB were obtained with univariate Cox proportional hazards models. CI, confidence interval; HR, hazard ratio; IPI, ipilimumab; NIVO, nivolumab; PFS, progression-free survival; TMB, tumor mutational burden.

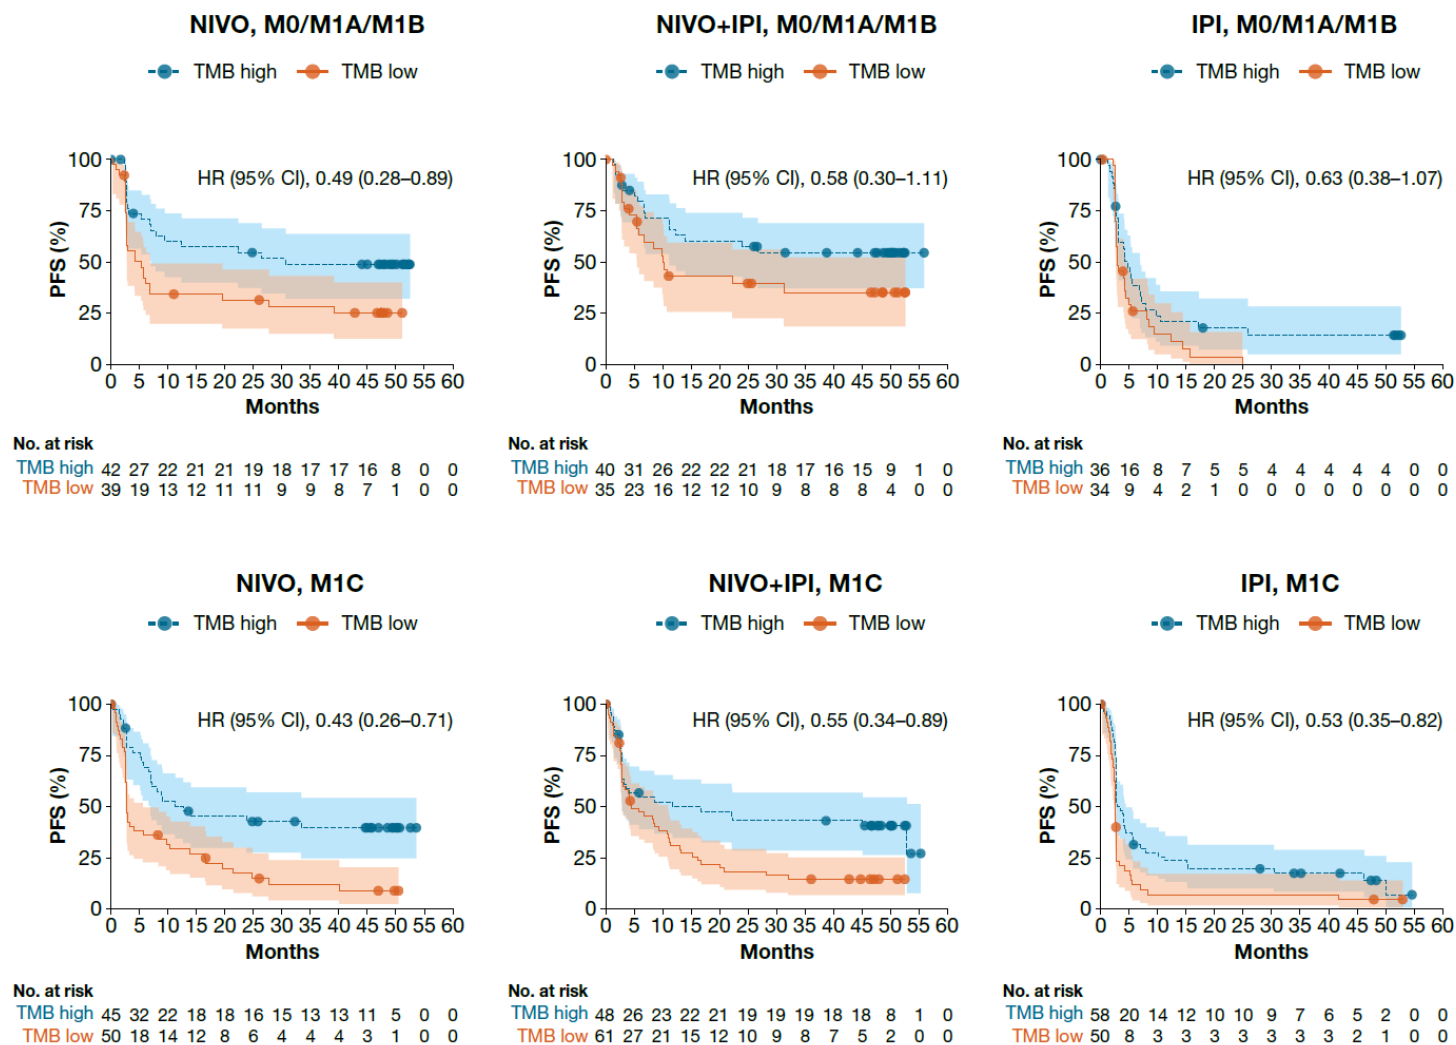

**Supplementary Figure 23.** Kaplan–Meier curves for OS by TMB status and metastatic stage in CheckMate 067. HRs (95% CI) for high versus low TMB were obtained with univariate Cox proportional hazards models. CI, confidence interval; HR, hazard ratio; IPI, ipilimumab; NIVO, nivolumab; OS, overall survival; TMB, tumor mutational burden.

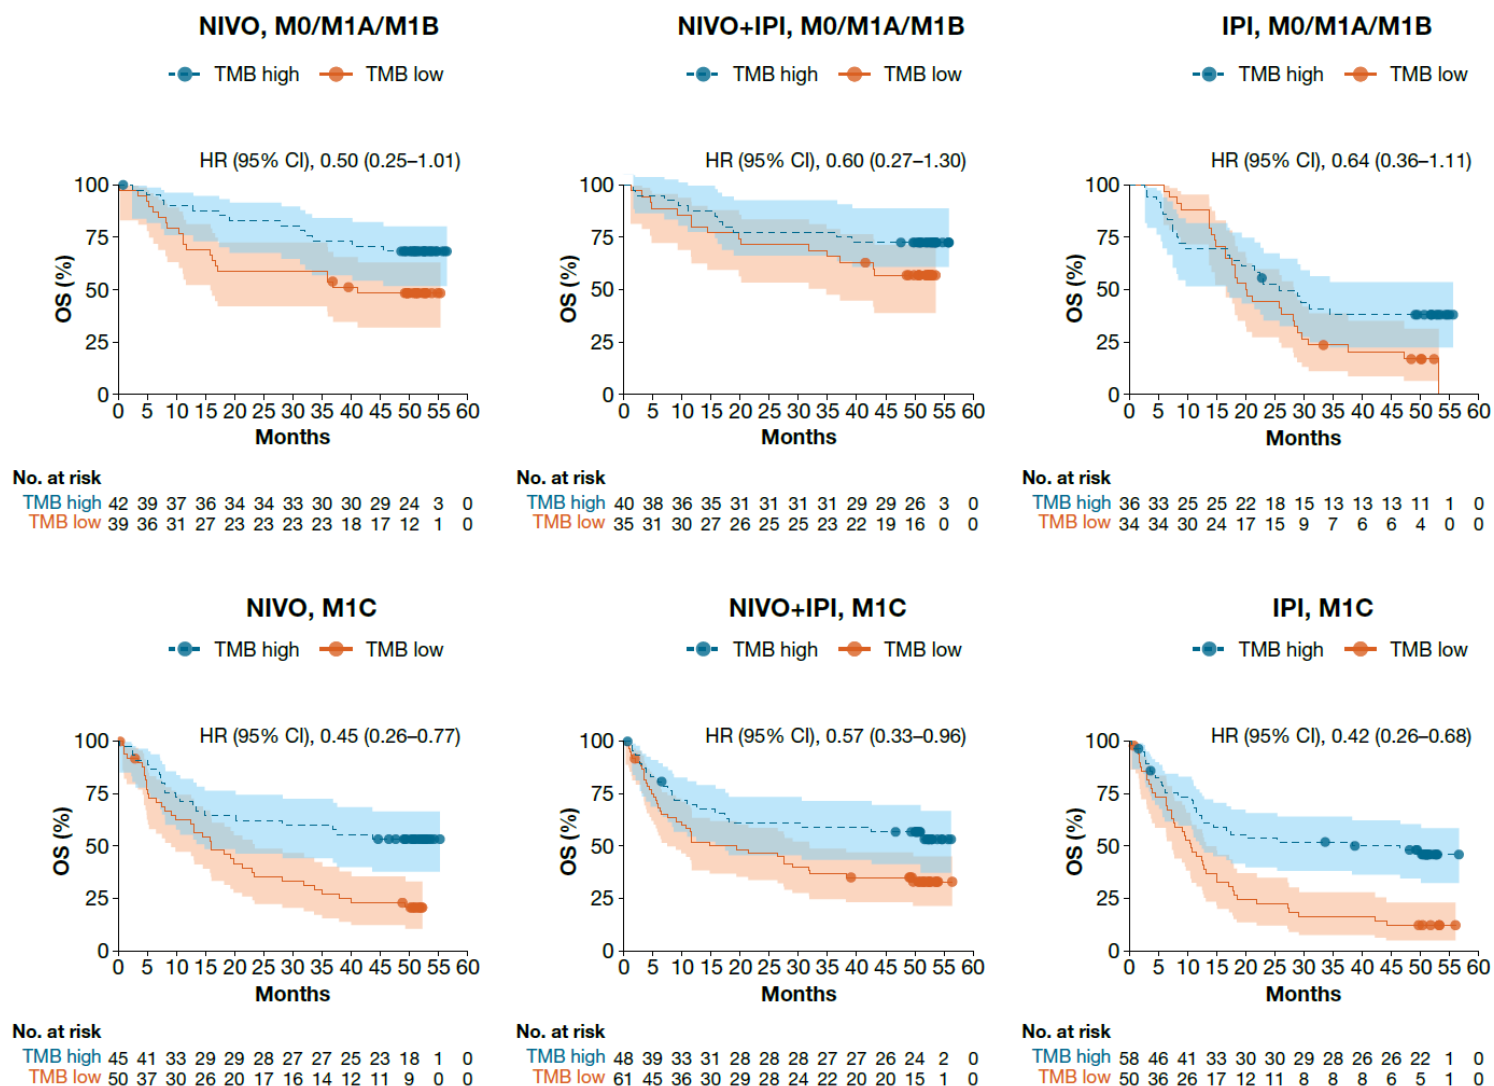

**Supplementary Figure 24.** Kaplan–Meier curves for PFS by TMB status and PD-L1 expression in CheckMate 067. HRs (95% CI) for high versus low TMB were obtained with univariate Cox proportional hazards models. CI, confidence interval; HR, hazard ratio; IPI, ipilimumab; NIVO, nivolumab; PD-L1, programmed death ligand 1; PFS, progression-free survival; TMB, tumor mutational burden.

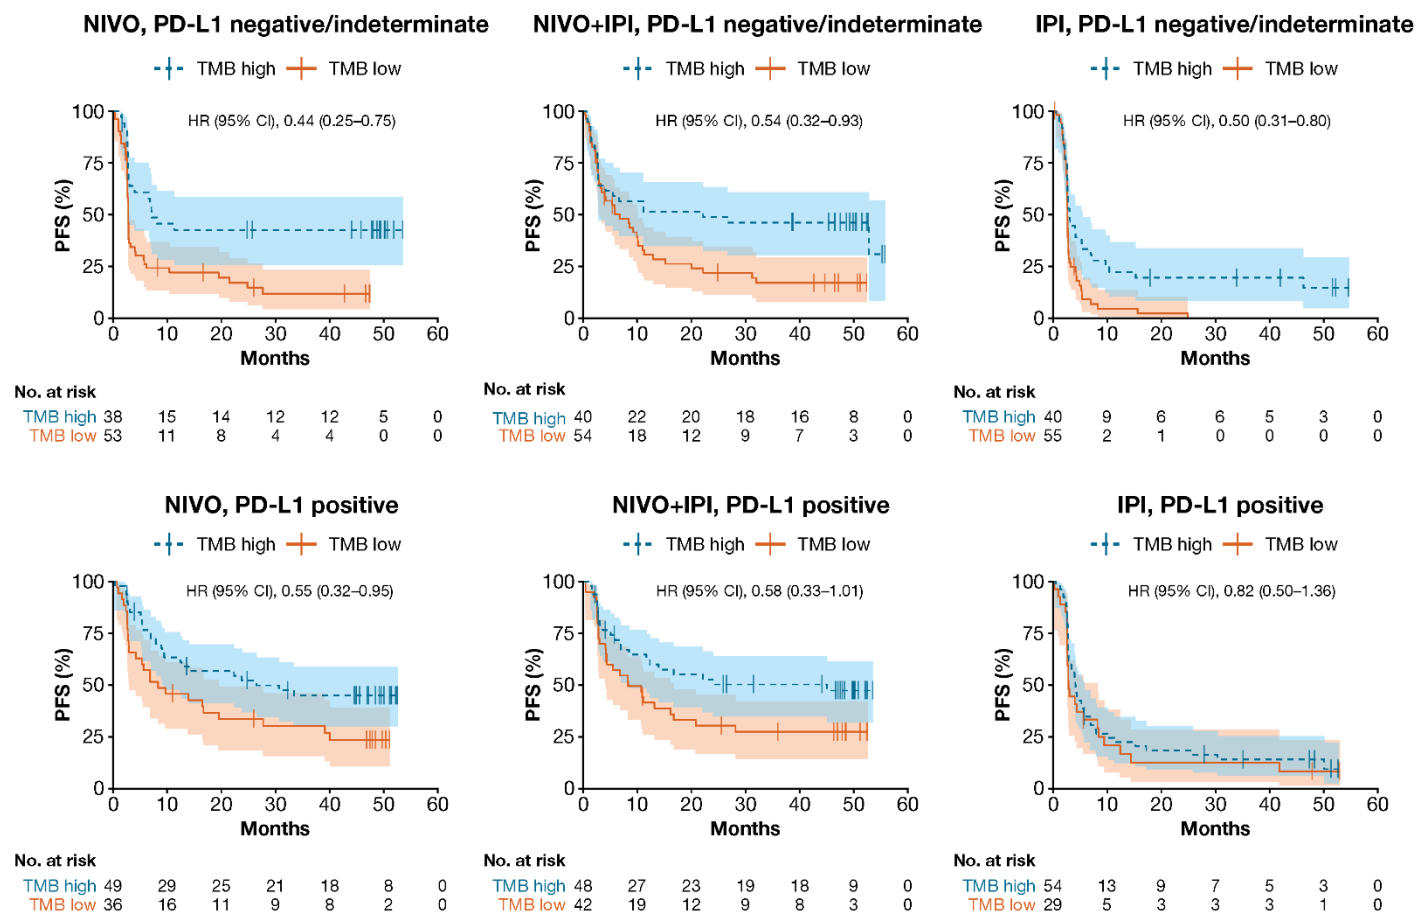

**Supplementary Figure 25.** Kaplan–Meier curves for OS by TMB status and PD-L1 expression in CheckMate 067. HRs (95% CI) for high versus low TMB were obtained with univariate Cox proportional hazards models. CI, confidence interval; HR, hazard ratio; IPI, ipilimumab; NIVO, nivolumab; OS, overall survival; PD-L1, programmed death ligand 1; TMB, tumor mutational burden.

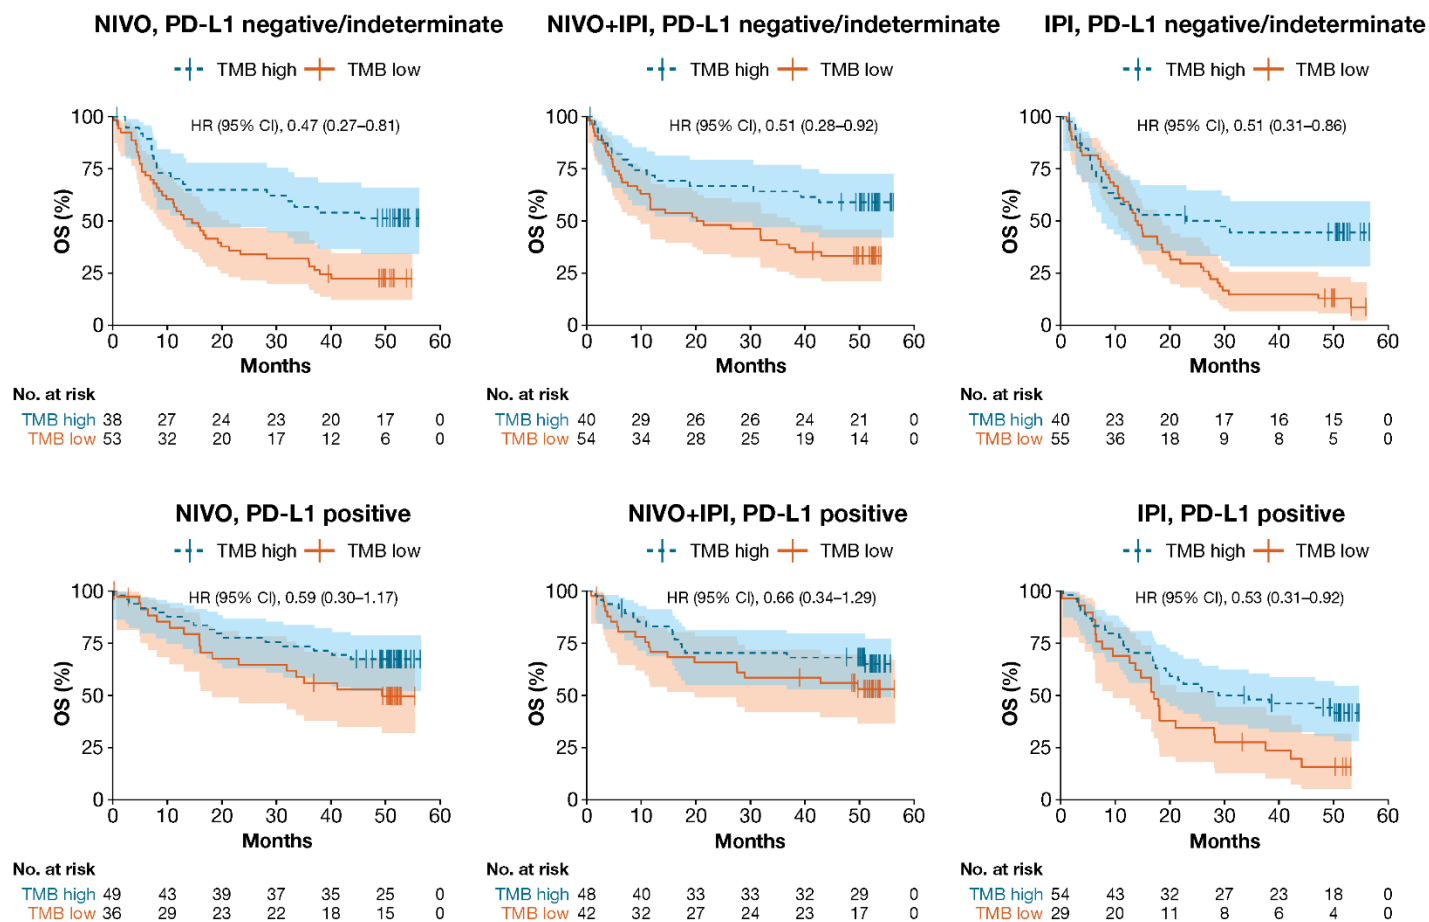

**Supplementary Figure 26.** Distribution of TMB for patients with  $BRAF^{WT}$  tumors (n = 359) and  $BRAF^{V600}$  tumors (n = 179) in CheckMate 067. Boxes extend from the first to third quartiles, the middle line shows the median, and the whiskers extend to the most extreme data point that is no more than 1.5 times the IQR from the box. TMB, tumor mutational burden; WT, wild-type.

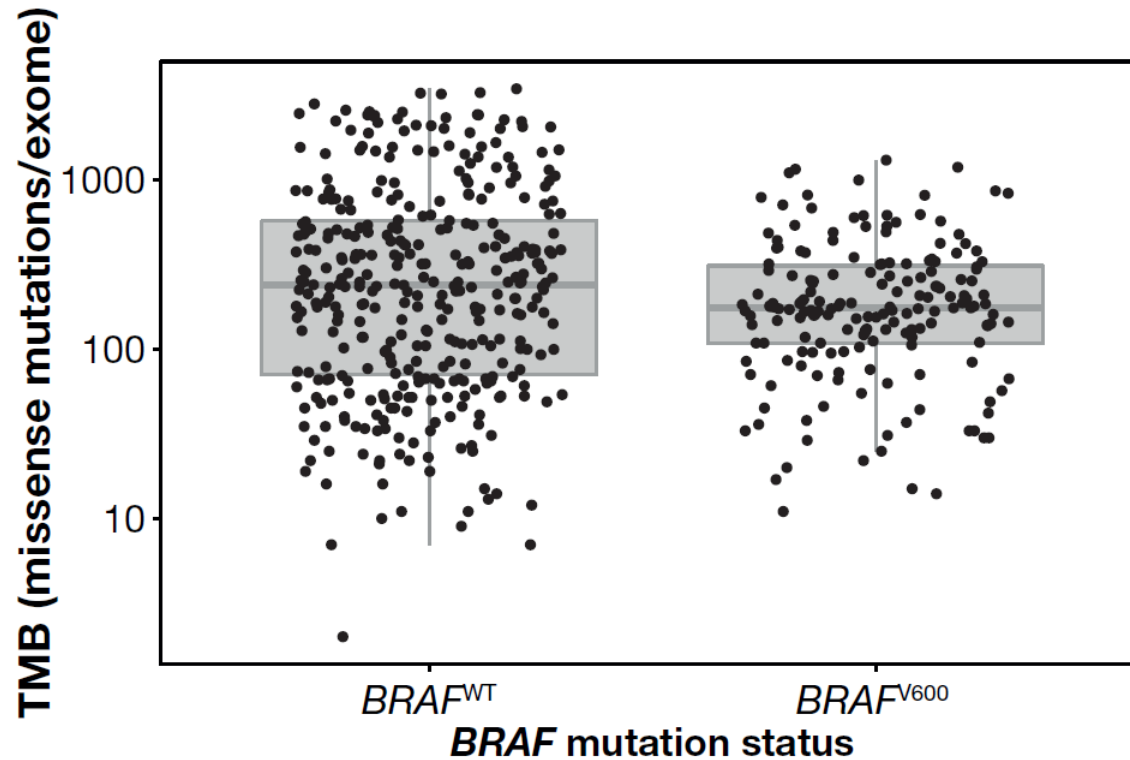

| <i>BRAF</i> V600 mutation status | Q1    | Median | Q3    |
|----------------------------------|-------|--------|-------|
| <i>BRAF</i> <sup>WT</sup>        | 71.0  | 240.0  | 573.0 |
| <i>BRAF</i> <sup>V600</sup>      | 109.0 | 176.0  | 312.5 |



**Supplementary Figure 27.** Kaplan–Meier curves for PFS by *BRAF* status and by  $\geq 5\%$  TC PD-L1 versus  $< 5\%$  TC/indeterminate PD-L1 expression in CheckMate 067. HRs (95% CI) for PD-L1 negative/indeterminate versus positive were obtained with univariate Cox proportional hazards models. CI, confidence interval; HR, hazard ratio; IPI, ipilimumab; NIVO, nivolumab; PD-L1, programmed death ligand 1; PFS, progression-free survival; TC, tumor cell; WT, wild-type.

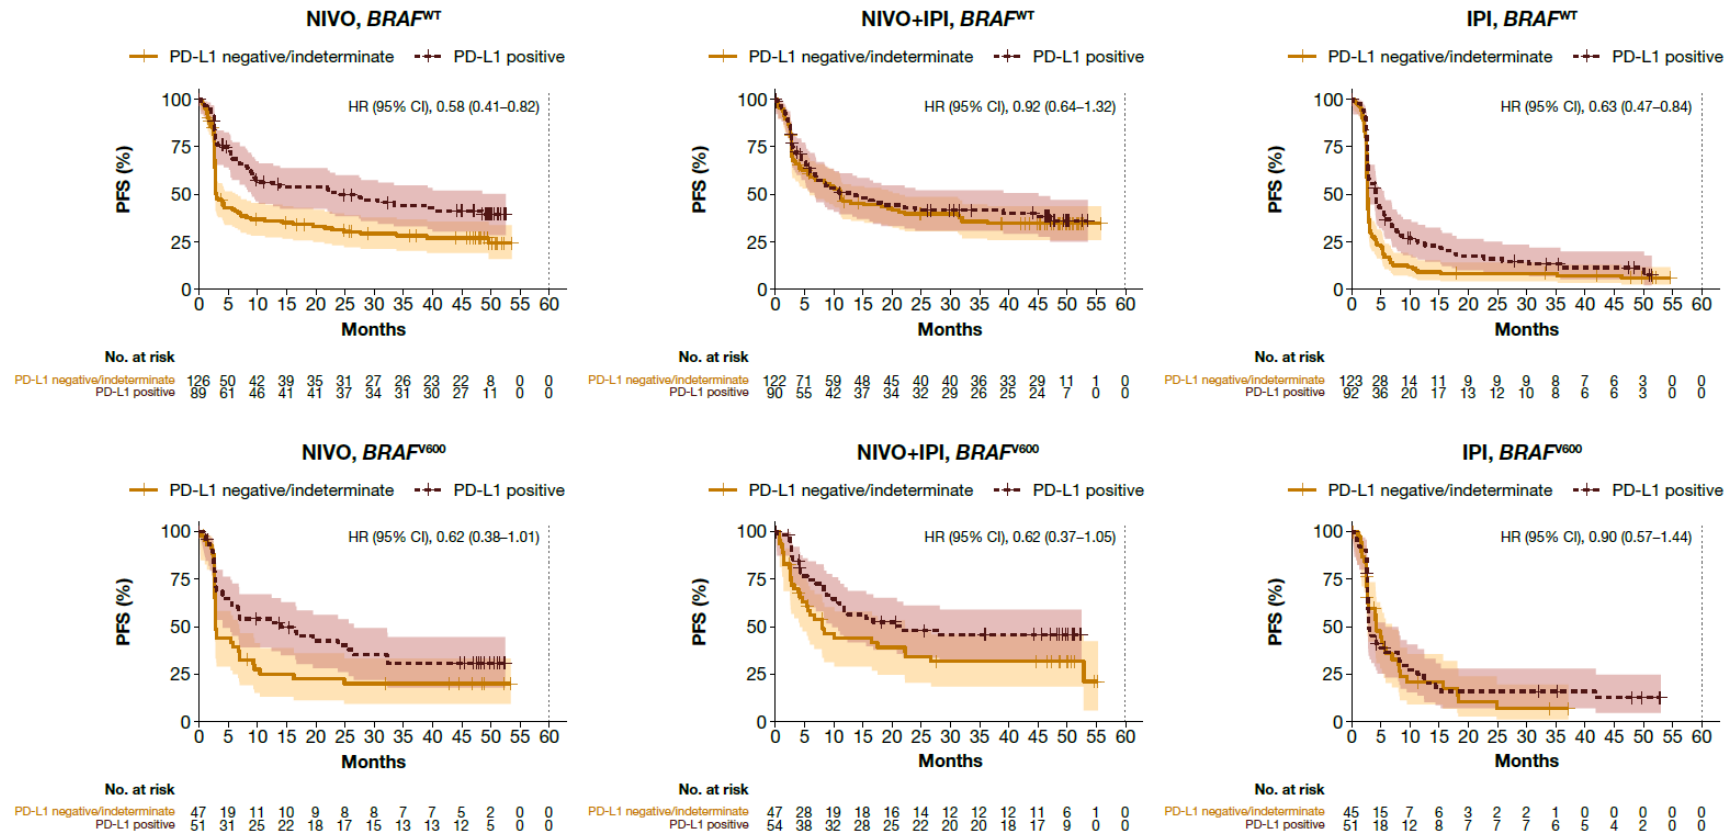

**Supplementary Figure 28.** Kaplan–Meier curves for OS by *BRAF* status and by  $\geq 5\%$  TC PD-L1 versus  $< 5\%$  TC/indeterminate PD-L1 expression in CheckMate 067. HRs (95% CI) for PD-L1 negative/indeterminate versus positive were obtained with univariate Cox proportional hazards models. CI, confidence interval; HR, hazard ratio; IPI, ipilimumab; NIVO, nivolumab; OS, overall survival; PD-L1, programmed death ligand 1; TC, tumor cell; WT, wild-type.

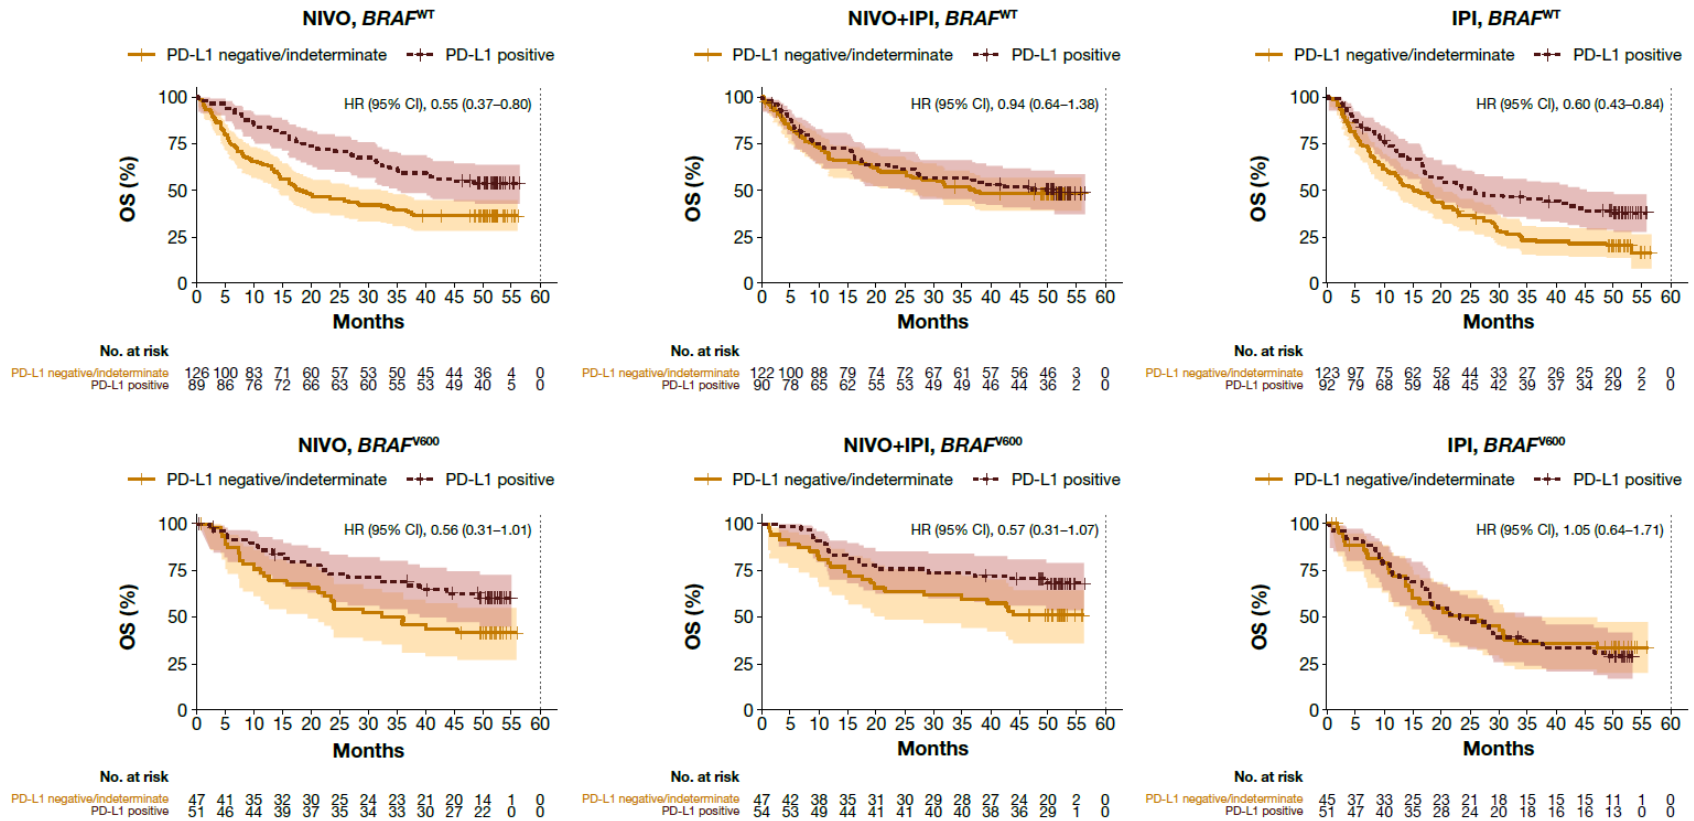

**Supplementary Figure 29.** ROC curves illustrating the ability of the inflammatory signature to predict response in CheckMate 067. AUC, area under the curve; CI, confidence interval; FPF, false positive fraction; IPI, ipilimumab; NIVO, nivolumab; ROC, receiver operating characteristic; TPF, true positive fraction.

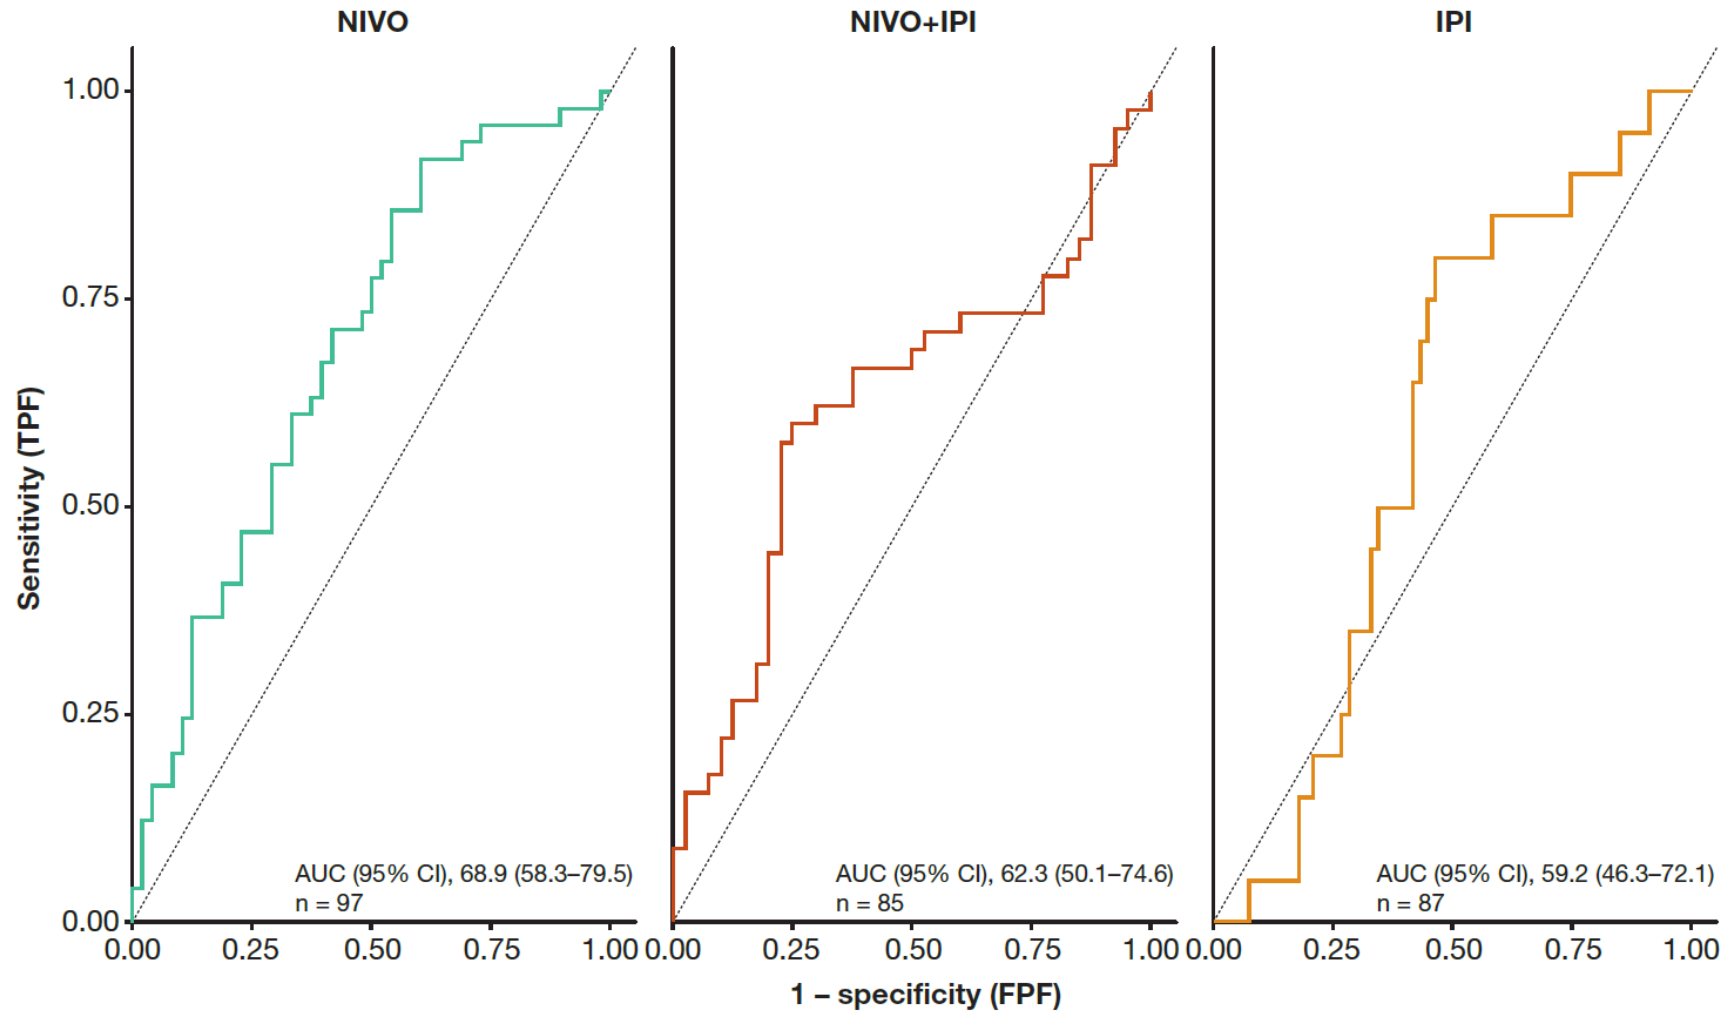

**Supplementary Figure 30.** Pearson's correlation analysis of the inflammatory signature with other published inflammation signatures in GEP-evaluable patients (n = 269) from CheckMate 067 (1-3).

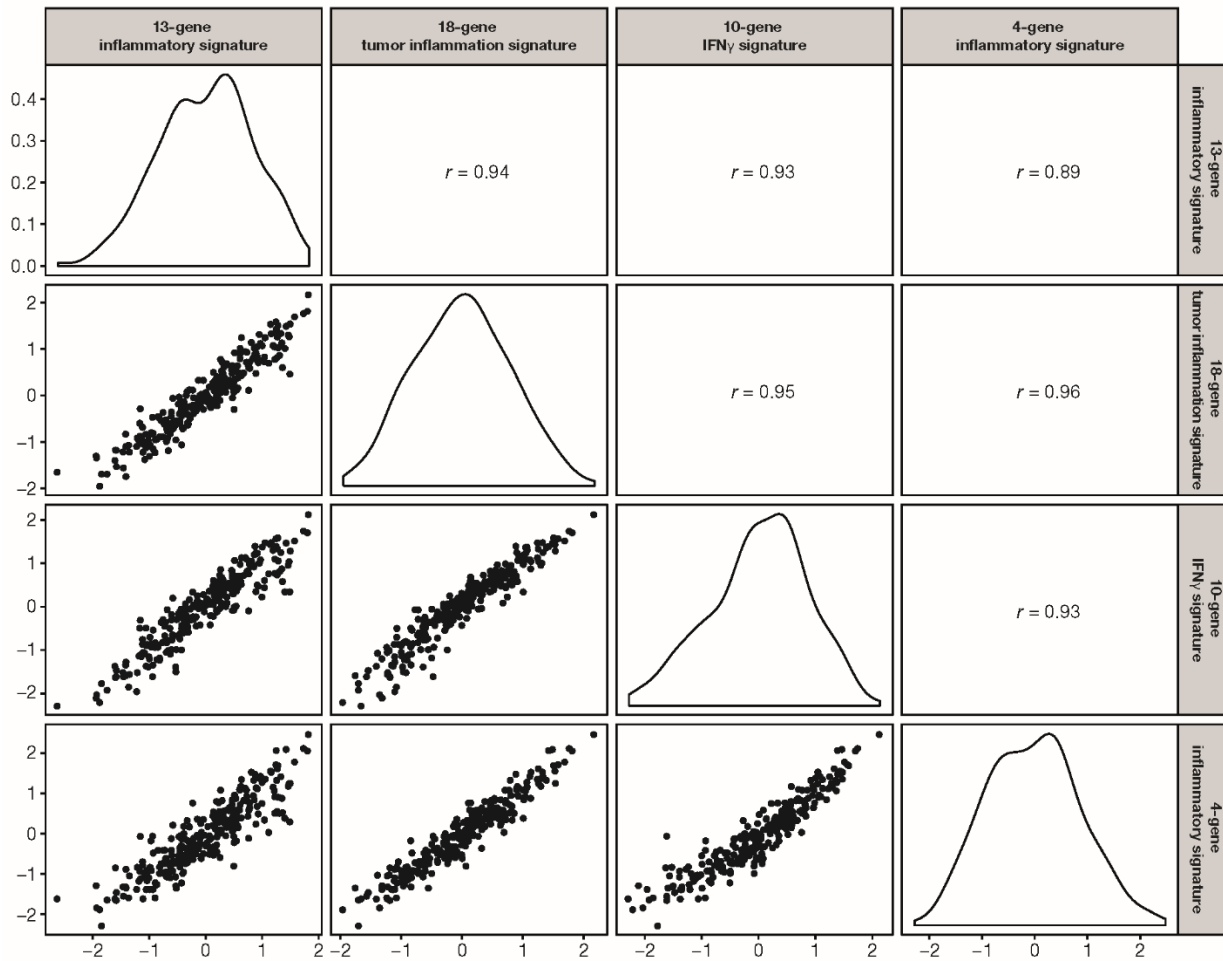

**Supplementary Figure 31.** Pearson's correlation analysis of the inflammatory signature versus tumor % PD-L1 expression by IHC in GEP-evaluable patients (n = 269) from CheckMate 067. IHC, immunohistochemistry; PD-L1, programmed death ligand 1; TC, tumor cell.

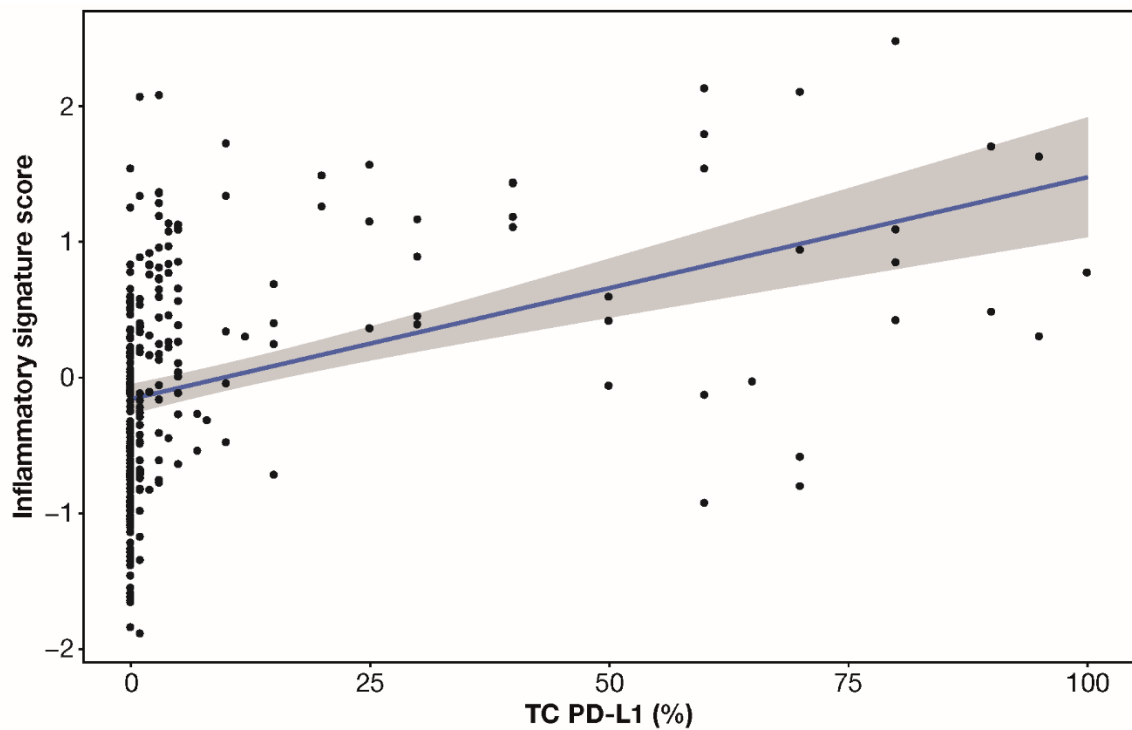

**Supplementary Figure 32.** Distribution of the inflammatory signature scores for patients with  $BRAF^{WT}$  tumors (n = 196) and  $BRAF^{V600}$  tumors (n = 73) in CheckMate 067. Boxes extend from the first to third quartiles, the middle line shows the median, and the whiskers extend to the most extreme data point that is no more than 1.5 times the IQR from the box. WT, wild-type.

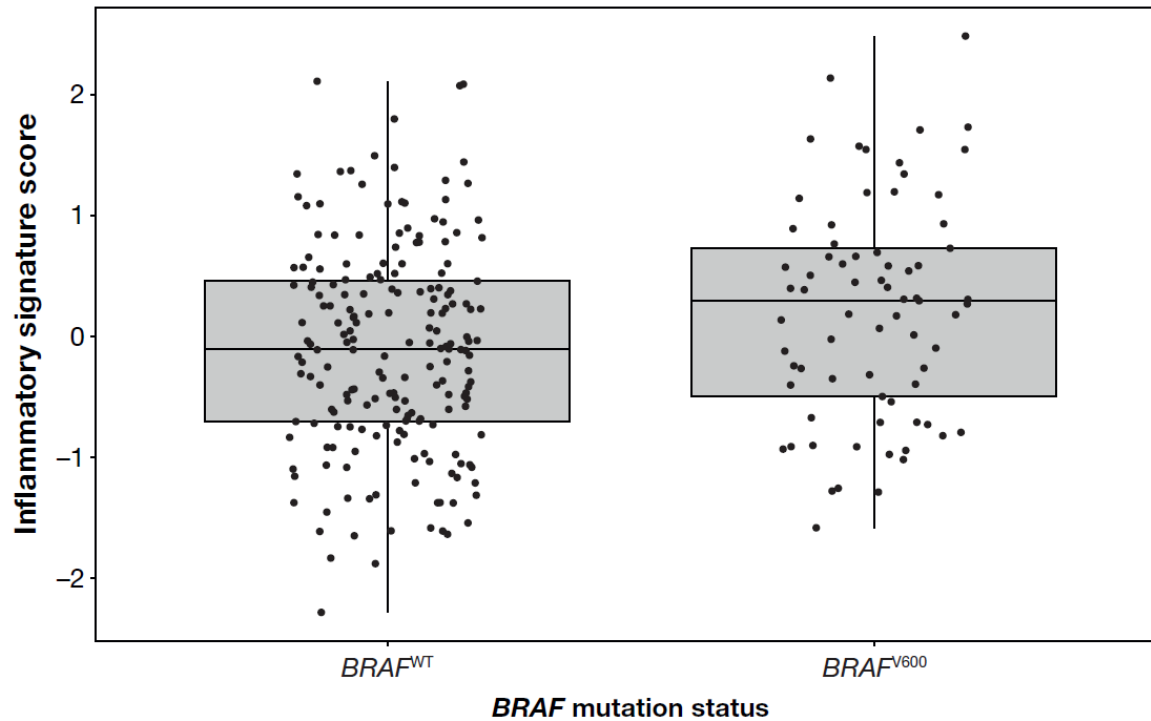

| $BRAF^{V600}$ mutation status | Q1    | Median | Q3   |
|-------------------------------|-------|--------|------|
| $BRAF^{WT}$                   | -0.71 | -0.10  | 0.46 |
| $BRAF^{V600}$                 | -0.50 | 0.29   | 0.73 |

**Supplementary Figure 33.** Distribution of responders and nonresponders by TMB and CD8 expression by IHC in each treatment arm of CheckMate 067. IHC, immunohistochemistry; IPI, ipilimumab; NIVO, nivolumab; NR, nonresponders; R, responders; TMB, tumor mutational burden.

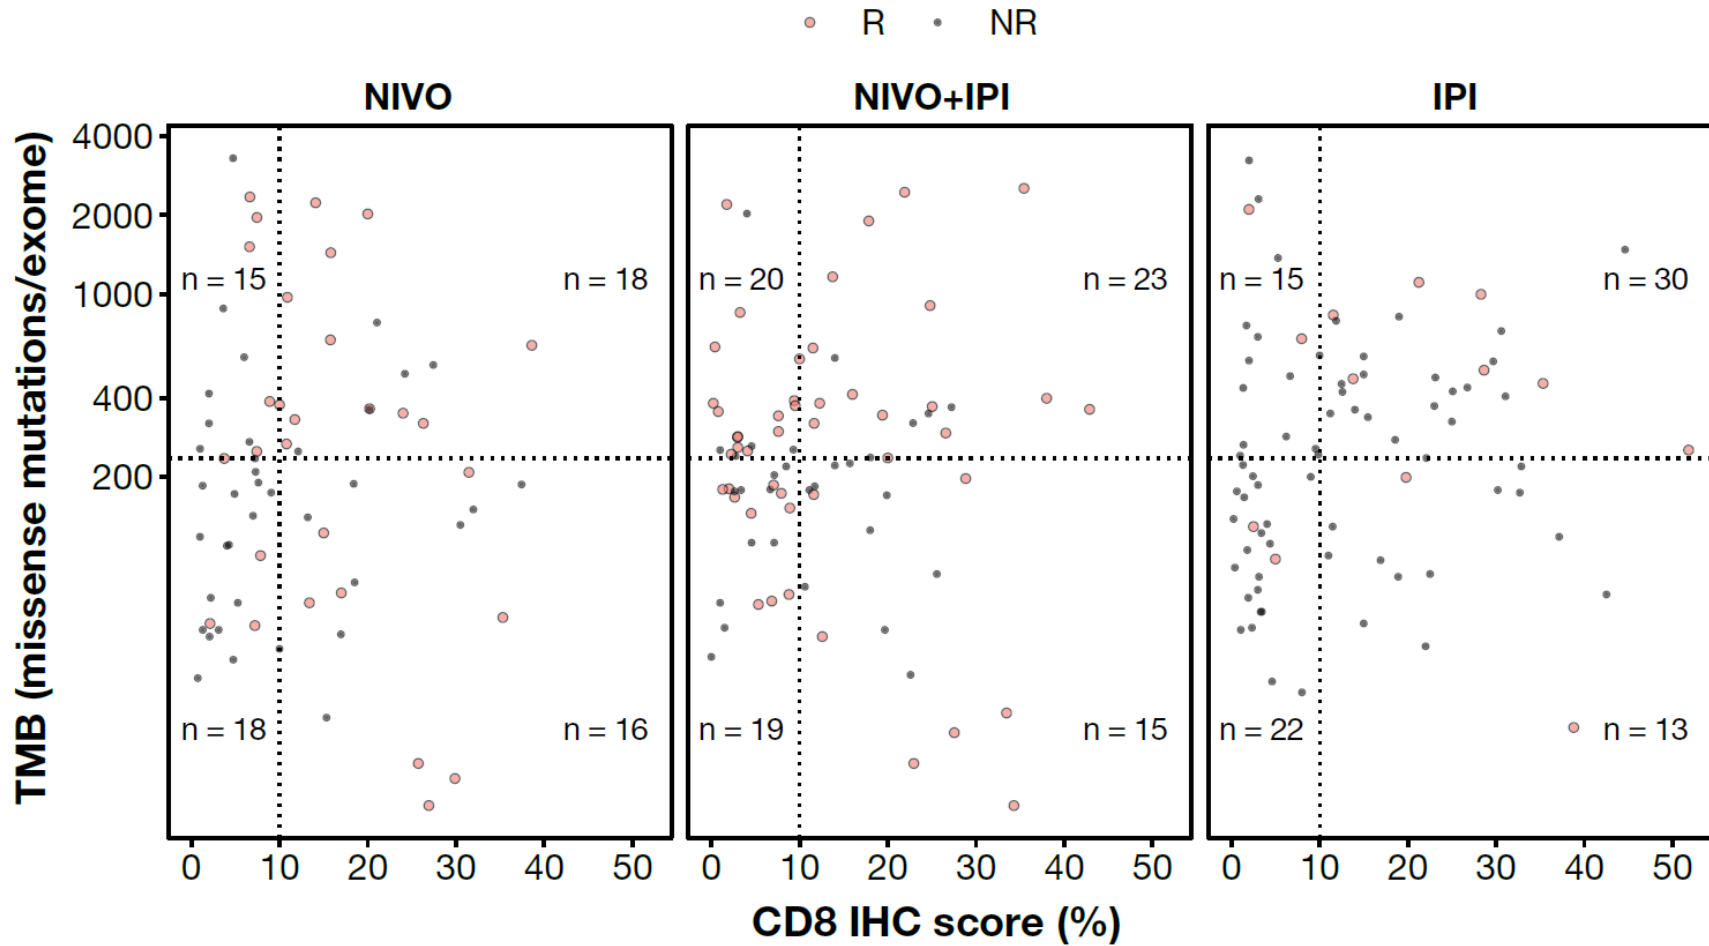

**Supplementary Figure 34.** TMB distribution versus mutation status for candidate genes in TMB-evaluable tumors from CheckMate 067 (n = 538). TMB, tumor mutational burden; WT, wild-type.

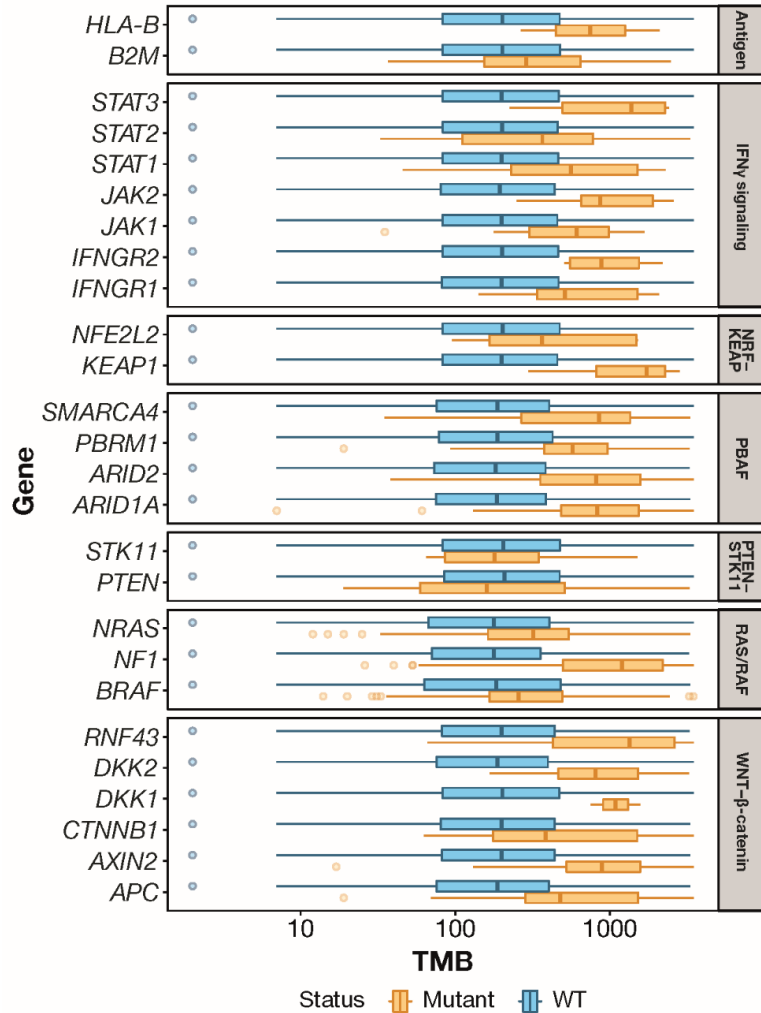



**Supplementary Figure 35.** Kaplan–Meier curves for PFS and OS comparing patient subgroups with and without stabilizing mutations in  $\beta$ -catenin in CheckMate 067. IPI, ipilimumab; NIVO, nivolumab; OS, overall survival; PFS, progression-free survival; WT, wild-type.

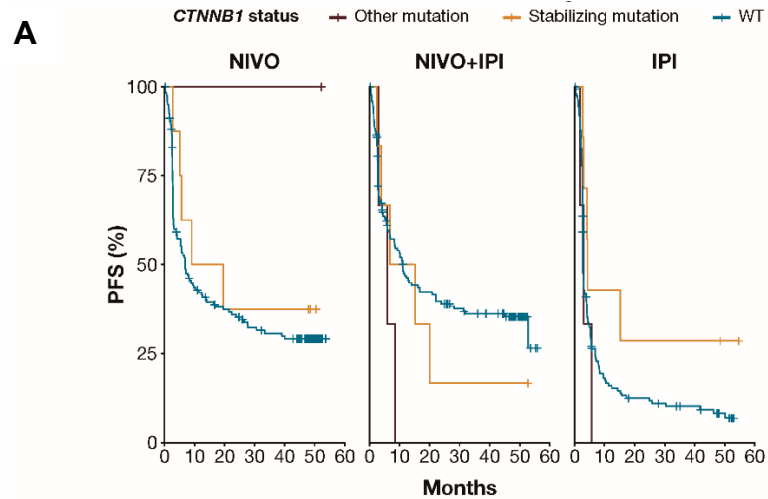

No. at risk (CTNNB1 status)

|                      |     |    |    |    |    |    |   |     |    |    |    |    |    |   |     |    |    |    |    |   |   |
|----------------------|-----|----|----|----|----|----|---|-----|----|----|----|----|----|---|-----|----|----|----|----|---|---|
| WT                   | 167 | 66 | 54 | 42 | 38 | 13 | 0 | 175 | 83 | 65 | 54 | 48 | 22 | 0 | 168 | 26 | 17 | 14 | 11 | 6 | 0 |
| Stabilizing mutation | 8   | 4  | 3  | 3  | 3  | 1  | 0 | 6   | 3  | 2  | 1  | 1  | 1  | 0 | 7   | 3  | 2  | 2  | 2  | 1 | 0 |
| Other mutation       | 1   | 1  | 1  | 1  | 1  | 1  | 0 | 3   | 0  | 0  | 0  | 0  | 0  | 0 | 3   | 0  | 0  | 0  | 0  | 0 | 0 |

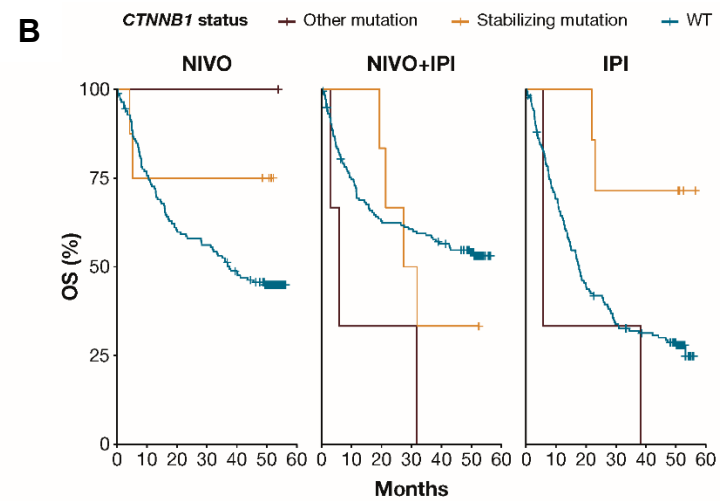

No. at risk (CTNNB1 status)

|                      |     |     |    |    |    |    |   |     |     |     |     |    |    |   |     |     |    |    |    |    |   |
|----------------------|-----|-----|----|----|----|----|---|-----|-----|-----|-----|----|----|---|-----|-----|----|----|----|----|---|
| WT                   | 167 | 124 | 99 | 92 | 78 | 57 | 0 | 175 | 128 | 108 | 104 | 96 | 79 | 0 | 168 | 114 | 73 | 55 | 48 | 37 | 0 |
| Stabilizing mutation | 8   | 6   | 6  | 6  | 6  | 5  | 0 | 6   | 6   | 5   | 3   | 2  | 2  | 0 | 7   | 7   | 7  | 5  | 5  | 5  | 0 |
| Other mutation       | 1   | 1   | 1  | 1  | 1  | 1  | 0 | 3   | 1   | 1   | 1   | 0  | 0  | 0 | 3   | 1   | 1  | 1  | 0  | 0  | 0 |

**TABLES**

**Supplementary Table 1.** Selected patient characteristics for TMB-evaluable and nonevaluable patients in CheckMate 067

| Characteristic          |                             | TMB not evaluable | TMB evaluable   | ITT population  |
|-------------------------|-----------------------------|-------------------|-----------------|-----------------|
|                         |                             | Patients, n (%)   | Patients, n (%) | Patients, n (%) |
| Treatment               | Not treated                 | 8 (2.0)           | 0 (0.0)         | 8 (0.9)         |
|                         | NIVO                        | 137 (33.7)        | 176 (32.7)      | 313 (33.1)      |
|                         | NIVO+IPI                    | 129 (31.7)        | 184 (34.2)      | 313 (33.1)      |
|                         | IPI                         | 133 (32.7)        | 178 (33.1)      | 311 (32.9)      |
| Age, years              | < 65                        | 240 (59.0)        | 325 (60.4)      | 565 (59.8)      |
|                         | ≥ 65 to < 75                | 118 (29.0)        | 144 (26.8)      | 262 (27.7)      |
|                         | ≥ 75                        | 49 (12.0)         | 69 (12.8)       | 118 (12.5)      |
| Metastatic stage        | M0/M1A/M1B                  | 171 (42.0)        | 226 (42.0)      | 397 (42.0)      |
|                         | M1C                         | 236 (58.0)        | 312 (58.0)      | 548 (58.0)      |
| ECOG performance status | 0                           | 303 (74.5)        | 388 (72.1)      | 691 (73.1)      |
|                         | 1                           | 103 (25.3)        | 149 (27.7)      | 252 (26.7)      |
|                         | 2                           | 0 (0.0)           | 1 (0.2)         | 1 (0.1)         |
|                         | Not available               | 1 (0.3)           | 0 (0.0)         | 1 (0.1)         |
| PD-L1 TC (≥ 5%)         | Negative/indeterminate      | 234 (57.5)        | 280 (52.0)      | 514 (54.4)      |
|                         | Positive                    | 173 (42.5)        | 258 (48.0)      | 431 (45.6)      |
| BRAF status             | <i>BRAF</i> <sup>V600</sup> | 119 (29.2)        | 179 (33.3)      | 298 (31.5)      |
|                         | <i>BRAF</i> <sup>WT</sup>   | 288 (70.8)        | 359 (66.7)      | 647 (68.5)      |
| Sex                     | Female                      | 153 (37.6)        | 182 (33.8)      | 335 (35.5)      |
|                         | Male                        | 254 (62.4)        | 356 (66.2)      | 610 (64.6)      |

Abbreviations: ECOG, Eastern Cooperative Oncology Group; IPI, ipilimumab; ITT, intent-to-treat; NIVO, nivolumab; PD-L1, programmed death ligand 1; TC, tumor cell; TMB, tumor mutational burden; WT, wild-type.

**Supplementary Table 2.** Selected patient characteristics for TMB-evaluable and nonevaluable patients in CheckMate 066

| Characteristic          |                        | TMB not evaluable | TMB evaluable   | ITT population  |
|-------------------------|------------------------|-------------------|-----------------|-----------------|
|                         |                        | Patients, n (%)   | Patients, n (%) | Patients, n (%) |
| Treatment               | Not treated            | 7 (2.3)           | 0 (0.0)         | 7 (1.7)         |
|                         | Dacarbazine            | 138 (46.2)        | 67 (56.3)       | 205 (49.0)      |
|                         | NIVO                   | 154 (51.5)        | 52 (43.7)       | 206 (49.3)      |
| Age, years              | < 65                   | 146 (48.8)        | 53 (44.5)       | 199 (47.6)      |
|                         | ≥ 65 to < 75           | 108 (36.1)        | 44 (37.0)       | 152 (36.4)      |
|                         | ≥ 75                   | 45 (15.1)         | 22 (18.5)       | 67 (16.0)       |
| Metastatic stage        | M0/M1A/M1B             | 115 (38.5)        | 54 (45.4)       | 169 (40.4)      |
|                         | M1C                    | 184 (61.5)        | 65 (54.6)       | 249 (59.6)      |
| ECOG performance status | 0                      | 189 (63.2)        | 80 (67.2)       | 269 (64.4)      |
|                         | 1                      | 107 (35.8)        | 37 (31.1)       | 144 (34.5)      |
|                         | 2                      | 2 (0.7)           | 2 (1.7)         | 4 (1.0)         |
|                         | Not available          | 1 (0.3)           | 0 (0.0)         | 1 (0.2)         |
| PD-L1 TC (≥ 5%)         | Negative/indeterminate | 205 (68.6)        | 65 (54.6)       | 270 (64.6)      |
|                         | Positive               | 94 (31.4)         | 54 (45.4)       | 148 (35.4)      |
| BRAF status             | Not available          | 5 (1.7)           | 3 (2.5)         | 8 (1.9)         |
|                         | BRAF <sup>WT</sup>     | 294 (98.3)        | 116 (97.5)      | 410 (98.1)      |
| Sex                     | Female                 | 125 (41.8)        | 47 (39.5)       | 172 (41.2)      |
|                         | Male                   | 174 (58.2)        | 72 (60.5)       | 246 (58.9)      |

Abbreviations: ECOG, Eastern Cooperative Oncology Group; ITT, intent-to-treat; NIVO, nivolumab; PD-L1, programmed death ligand 1; TC, tumor cell; TMB, tumor mutational burden; WT, wild-type.

**Supplementary Table 3.** Selected patient characteristics for GEP-evaluable and nonevaluable patients in CheckMate 067

| Characteristic          |                             | GEP not evaluable | GEP evaluable   | ITT population  |
|-------------------------|-----------------------------|-------------------|-----------------|-----------------|
|                         |                             | Patients, n (%)   | Patients, n (%) | Patients, n (%) |
| Treatment               | Not treated                 | 8 (1.2)           | 0 (0.0)         | 8 (0.9)         |
|                         | NIVO                        | 216 (32.0)        | 97 (36.1)       | 313 (33.1)      |
|                         | NIVO+IPI                    | 228 (33.7)        | 85 (31.6)       | 313 (33.1)      |
|                         | IPI                         | 224 (33.1)        | 87 (32.3)       | 311 (32.9)      |
| Age, years              | < 65                        | 402 (59.5)        | 163 (60.6)      | 565 (59.8)      |
|                         | ≥ 65 to < 75                | 187 (27.7)        | 75 (27.9)       | 262 (27.7)      |
|                         | ≥ 75                        | 87 (12.9)         | 31 (11.5)       | 118 (12.5)      |
| Metastatic stage        | M0/M1A/M1B                  | 288 (42.6)        | 109 (40.5)      | 397 (42.0)      |
|                         | M1C                         | 388 (57.4)        | 160 (59.5)      | 548 (58.0)      |
| ECOG performance status | 0                           | 511 (75.6)        | 180 (66.9)      | 691 (73.1)      |
|                         | 1                           | 163 (24.1)        | 89 (33.1)       | 252 (26.7)      |
|                         | 2                           | 1 (0.2)           | 0 (0.0)         | 1 (0.1)         |
|                         | Not available               | 1 (0.2)           | 0 (0.0)         | 1 (0.1)         |
| PD-L1 TC (≥ 5%)         | Negative/indeterminate      | 369 (54.6)        | 145 (53.9)      | 514 (54.4)      |
|                         | Positive                    | 307 (45.4)        | 124 (46.1)      | 431 (45.6)      |
| BRAF status             | <i>BRAF</i> <sup>V600</sup> | 225 (33.3)        | 73 (27.1)       | 298 (31.5)      |
|                         | <i>BRAF</i> <sup>WT</sup>   | 451 (66.7)        | 196 (72.9)      | 647 (68.5)      |
| Sex                     | Female                      | 236 (34.9)        | 99 (36.8)       | 335 (35.5)      |
|                         | Male                        | 440 (65.1)        | 170 (63.2)      | 610 (64.6)      |

Abbreviations: ECOG, Eastern Cooperative Oncology Group; GEP, gene expression profiling; IPI, ipilimumab; ITT, intent-to-treat; NIVO, nivolumab; PD-L1, programmed death ligand 1; TC, tumor cell; WT, wild-type.

**Supplementary Table 4.** ORR for TMB-evaluable and nonevaluable patients by treatment arm in CheckMate 067

| <b>Treatment</b> | <b>TMB evaluable</b>  | <b>Nonresponders, n (%)<sup>a</sup></b> | <b>Responders, n (%)<sup>b</sup></b> |
|------------------|-----------------------|-----------------------------------------|--------------------------------------|
| <b>NIVO</b>      | No                    | 78 (57)                                 | 59 (43)                              |
|                  | Yes                   | 94 (53)                                 | 82 (47)                              |
|                  | As-treated population | 172 (55)                                | 141 (45)                             |
| <b>NIVO+IPI</b>  | No                    | 52 (40)                                 | 77 (60)                              |
|                  | Yes                   | 78 (42)                                 | 106 (58)                             |
|                  | As-treated population | 130 (42)                                | 183 (58)                             |
| <b>IPI</b>       | No                    | 109 (82)                                | 24 (18)                              |
|                  | Yes                   | 142 (80)                                | 36 (20)                              |
|                  | As-treated population | 251 (81)                                | 60 (19)                              |

<sup>a</sup>Nonresponders include patients experiencing stable or progressive disease or those whose best overall response could not be determined.

<sup>b</sup>Responders include patients who achieved complete or partial response.

Abbreviations: IPI, ipilimumab; NIVO, nivolumab; ORR, objective response rate; TMB, tumor mutational burden.

**Supplementary Table 5.** ORR for TMB-evaluable and nonevaluable patients by initial treatment in CheckMate 066

| <b>Treatment</b>   | <b>TMB evaluable</b>  | <b>Nonresponders, n (%)<sup>a</sup></b> | <b>Responders, n (%)<sup>b</sup></b> |
|--------------------|-----------------------|-----------------------------------------|--------------------------------------|
| <b>NIVO</b>        | No                    | 87 (57)                                 | 67 (44)                              |
|                    | Yes                   | 30 (58)                                 | 22 (42)                              |
|                    | As-treated population | 117 (57)                                | 89 (43)                              |
| <b>Dacarbazine</b> | No                    | 119 (86)                                | 19 (14)                              |
|                    | Yes                   | 56 (84)                                 | 11 (16)                              |
|                    | As-treated population | 175 (85)                                | 30 (15)                              |

<sup>a</sup>Nonresponders include patients experiencing stable or progressive disease or those whose best overall response could not be determined.

<sup>b</sup>Responders include patients who achieved complete or partial response.

Abbreviations: NIVO, nivolumab; ORR, objective response rate; TMB, tumor mutational burden.

**Supplementary Table 6.** ORR for GEP-evaluable and nonevaluable patients in CheckMate 067

| <b>Treatment</b> | <b>GEP evaluable</b>  | <b>Nonresponders, n (%)<sup>a</sup></b> | <b>Responders, n (%)<sup>b</sup></b> |
|------------------|-----------------------|-----------------------------------------|--------------------------------------|
| <b>NIVO</b>      | No                    | 124 (57)                                | 92 (43)                              |
|                  | Yes                   | 48 (49)                                 | 49 (51)                              |
|                  | As-treated population | 172 (55)                                | 141 (45)                             |
| <b>NIVO+IPI</b>  | No                    | 90 (39)                                 | 138 (61)                             |
|                  | Yes                   | 40 (47)                                 | 45 (53)                              |
|                  | As-treated population | 130 (42)                                | 183 (58)                             |
| <b>IPI</b>       | No                    | 184 (82)                                | 40 (18)                              |
|                  | Yes                   | 67 (77)                                 | 20 (23)                              |
|                  | As-treated population | 251 (81)                                | 60 (19)                              |

<sup>a</sup>Nonresponders include patients experiencing stable or progressive disease or those whose best overall response could not be determined.

<sup>b</sup>Responders include patients who achieved complete or partial response.

Abbreviations: GEP, gene expression profiling; IPI, ipilimumab; NIVO, nivolumab; ORR, objective response rate.

**Supplementary Table 7.** ORR by TMB status in CheckMate 066

| <b>Treatment</b>   | <b>TMB class, N</b>        | <b>Nonresponders, n<sup>a</sup></b> | <b>Responders, n<sup>b</sup></b> | <b>ORR, %</b> |
|--------------------|----------------------------|-------------------------------------|----------------------------------|---------------|
| <b>NIVO</b>        | Low, 29                    | 21                                  | 8                                | 27.6          |
|                    | High, 23                   | 9                                   | 14                               | 60.9          |
|                    | As-treated population, 206 | 117                                 | 89                               | 43.2          |
| <b>Dacarbazine</b> | Low, 31                    | 26                                  | 5                                | 16.1          |
|                    | High, 36                   | 30                                  | 6                                | 16.7          |
|                    | As-treated population, 205 | 175                                 | 30                               | 14.6          |

<sup>a</sup>Nonresponders include patients experiencing stable or progressive disease or those whose best overall response could not be determined.

<sup>b</sup>Responders include patients who achieved complete or partial response.

Abbreviations: NIVO, nivolumab; ORR, objective response rate; TMB, tumor mutational burden.



**Supplementary Table 8.** ORR for TMB-high versus TMB-low by arm and PD-L1  $\geq$  5% TC PD-L1 versus < 5% TC/indeterminate PD-L1 expression in CheckMate 067

| Treatment | PD-L1                      | TMB class | Nonresponders, n <sup>a</sup> | Responders, n <sup>b</sup> | Total, N | ORR, % |
|-----------|----------------------------|-----------|-------------------------------|----------------------------|----------|--------|
| NIVO      | Positive                   | High      | 12                            | 37                         | 49       | 75.5   |
|           | Positive                   | Low       | 21                            | 15                         | 36       | 41.7   |
|           | Negative/<br>indeterminate | High      | 21                            | 17                         | 38       | 44.7   |
|           | Negative/<br>indeterminate | Low       | 40                            | 13                         | 53       | 24.5   |
| NIVO+IPI  | Positive                   | High      | 13                            | 35                         | 48       | 72.9   |
|           | Positive                   | Low       | 17                            | 25                         | 42       | 59.5   |
|           | Negative/<br>indeterminate | High      | 18                            | 22                         | 40       | 55.0   |
|           | Negative/<br>indeterminate | Low       | 30                            | 24                         | 54       | 44.4   |
| IPI       | Positive                   | High      | 41                            | 13                         | 54       | 24.1   |
|           | Positive                   | Low       | 22                            | 7                          | 29       | 24.1   |
|           | Negative/<br>indeterminate | High      | 29                            | 11                         | 40       | 27.5   |
|           | Negative/<br>indeterminate | Low       | 50                            | 5                          | 55       | 9.1    |

<sup>a</sup>Nonresponders include patients experiencing stable or progressive disease or those whose best overall response could not be determined.

<sup>b</sup>Responders include patients who achieved complete or partial response.

Abbreviations: IPI, ipilimumab; NIVO, nivolumab; ORR, objective response rate; PD-L1, programmed death ligand 1; TC, tumor cell; TMB, tumor mutational burden.

**Supplementary Table 9.** ORR for TMB-high versus TMB-low by arm and PD-L1 ≥ 5% TC PD-L1 versus < 5% TC/indeterminate PD-L1 expression in CheckMate 066

| Treatment          | PD-L1                      | TMB class | Nonresponders, n <sup>a</sup> | Responders, n <sup>b</sup> | Total, N | ORR, % |
|--------------------|----------------------------|-----------|-------------------------------|----------------------------|----------|--------|
| <b>NIVO</b>        | Positive                   | High      | 4                             | 8                          | 12       | 66.7   |
|                    | Positive                   | Low       | 7                             | 6                          | 13       | 46.2   |
|                    | Negative/<br>indeterminate | High      | 5                             | 6                          | 11       | 54.5   |
|                    | Negative/<br>indeterminate | Low       | 14                            | 2                          | 16       | 12.5   |
| <b>Dacarbazine</b> | Positive                   | High      | 14                            | 3                          | 17       | 17.6   |
|                    | Positive                   | Low       | 10                            | 2                          | 12       | 16.7   |
|                    | Negative/<br>indeterminate | High      | 16                            | 3                          | 19       | 15.8   |
|                    | Negative/<br>indeterminate | Low       | 16                            | 3                          | 19       | 15.8   |

<sup>a</sup>Nonresponders include patients experiencing stable or progressive disease or those whose best overall response could not be determined.

<sup>b</sup>Responders include patients who achieved complete or partial response.

Abbreviations: NIVO, nivolumab; ORR, objective response rate; PD-L1, programmed death ligand 1; TC, tumor cell; TMB, tumor mutational burden.

**Supplementary Table 10.** PFS and OS HRs for TMB-high versus TMB-low by arm and metastatic stage in CheckMate 067

| <b>Treatment</b> | <b>Metastatic stage</b> | <b>PFS HR (95% CI)</b> | <b>OS HR (95% CI)</b> |
|------------------|-------------------------|------------------------|-----------------------|
| <b>NIVO</b>      | M0/M1A/M1B              | 0.49 (0.27–0.87)       | 0.50 (0.25–1.00)      |
|                  | M1C                     | 0.41 (0.25–0.68)       | 0.45 (0.26–0.77)      |
| <b>NIVO+IPI</b>  | M0/M1A/M1B              | 0.60 (0.31–1.10)       | 0.59 (0.27–1.30)      |
|                  | M1C                     | 0.57 (0.36–0.91)       | 0.54 (0.32–0.92)      |
| <b>IPI</b>       | M0/M1A/M1B              | 0.69 (0.42–1.10)       | 0.70 (0.40–1.20)      |
|                  | M1C                     | 0.51 (0.34–0.78)       | 0.40 (0.25–0.64)      |

Abbreviations: CI, confidence interval; HR, hazard ratio; IPI, ipilimumab; NIVO, nivolumab; OS, overall survival; PFS, progression-free survival; TMB, tumor mutational burden.

**Supplementary Table 11.** ORR by PD-L1 expression ( $\geq 5\%$  TC PD-L1 versus  $< 5\%$  TC/indeterminate PD-L1 expression), *BRAF* mutation status, and arm in CheckMate 067

| Treatment | PD-L1                      | <i>BRAF</i> status          | Nonresponders, n <sup>a</sup> | Responders, n <sup>b</sup> | Total, N | ORR, % |
|-----------|----------------------------|-----------------------------|-------------------------------|----------------------------|----------|--------|
| NIVO      | Positive                   | <i>BRAF</i> <sup>WT</sup>   | 33                            | 56                         | 89       | 62.9   |
|           | Positive                   | <i>BRAF</i> <sup>V600</sup> | 24                            | 27                         | 51       | 52.9   |
|           | Negative/<br>indeterminate | <i>BRAF</i> <sup>WT</sup>   | 81                            | 45                         | 126      | 35.7   |
|           | Negative/<br>indeterminate | <i>BRAF</i> <sup>V600</sup> | 34                            | 13                         | 47       | 27.7   |
| NIVO+IPI  | Positive                   | <i>BRAF</i> <sup>WT</sup>   | 36                            | 54                         | 90       | 60.0   |
|           | Positive                   | <i>BRAF</i> <sup>V600</sup> | 11                            | 43                         | 54       | 79.6   |
|           | Negative/<br>indeterminate | <i>BRAF</i> <sup>WT</sup>   | 61                            | 61                         | 122      | 50.0   |
|           | Negative/<br>indeterminate | <i>BRAF</i> <sup>V600</sup> | 22                            | 25                         | 47       | 53.2   |
| IPI       | Positive                   | <i>BRAF</i> <sup>WT</sup>   | 71                            | 21                         | 92       | 22.8   |
|           | Positive                   | <i>BRAF</i> <sup>V600</sup> | 39                            | 12                         | 51       | 23.5   |
|           | Negative/<br>indeterminate | <i>BRAF</i> <sup>WT</sup>   | 106                           | 17                         | 123      | 13.8   |
|           | Negative/<br>indeterminate | <i>BRAF</i> <sup>V600</sup> | 35                            | 10                         | 45       | 22.2   |

<sup>a</sup>Nonresponders include patients experiencing stable or progressive disease or those whose best overall response could not be determined.

<sup>b</sup>Responders include patients who achieved complete or partial response.

Abbreviations: IPI, ipilimumab; NIVO, nivolumab; ORR, objective response rate; PD-L1, programmed death ligand 1; TC, tumor cell; WT, wild-type.

**Supplementary Table 12.** ORR by inflammatory signature score status in CheckMate 067

| <b>Treatment</b> | <b>Signature score, N</b>  | <b>Nonresponders, n<sup>a</sup></b> | <b>Responders, n<sup>b</sup></b> | <b>ORR, %</b> |
|------------------|----------------------------|-------------------------------------|----------------------------------|---------------|
| <b>NIVO</b>      | Low, 51                    | 32                                  | 19                               | 37.3          |
|                  | High, 46                   | 16                                  | 30                               | 65.2          |
|                  | As-treated population, 313 | 172                                 | 141                              | 45.0          |
| <b>NIVO+IPI</b>  | Low, 44                    | 27                                  | 17                               | 38.6          |
|                  | High, 41                   | 13                                  | 28                               | 68.3          |
|                  | As-treated population, 313 | 130                                 | 183                              | 58.5          |
| <b>IPI</b>       | Low, 40                    | 36                                  | 4                                | 10.0          |
|                  | High, 47                   | 31                                  | 16                               | 34.0          |
|                  | As-treated population, 311 | 251                                 | 60                               | 19.3          |

<sup>a</sup>Nonresponders include patients experiencing stable or progressive disease or those whose best overall response could not be determined.

<sup>b</sup>Responders include patients who achieved complete or partial response.

Abbreviations: IPI, ipilimumab; NIVO, nivolumab; ORR, objective response rate.

**Supplementary Table 13.** ORR by TMB and inflammatory signature score status in CheckMate 067

| Treatment       | TMB class | Inflammatory signature score | Nonresponders, n <sup>a</sup> | Responders, n <sup>b</sup> | Total, N | ORR, % |
|-----------------|-----------|------------------------------|-------------------------------|----------------------------|----------|--------|
| <b>NIVO</b>     | High      | Low                          | 5                             | 6                          | 11       | 54.6   |
|                 | High      | High                         | 6                             | 18                         | 24       | 75.0   |
|                 | Low       | Low                          | 21                            | 6                          | 27       | 22.2   |
|                 | Low       | High                         | 6                             | 7                          | 13       | 53.9   |
| <b>NIVO+IPI</b> | High      | Low                          | 8                             | 8                          | 16       | 50.0   |
|                 | High      | High                         | 6                             | 12                         | 18       | 66.7   |
|                 | Low       | Low                          | 15                            | 5                          | 20       | 25.0   |
|                 | Low       | High                         | 4                             | 13                         | 17       | 76.5   |
| <b>IPI</b>      | High      | Low                          | 9                             | 2                          | 11       | 18.2   |
|                 | High      | High                         | 21                            | 8                          | 29       | 27.6   |
|                 | Low       | Low                          | 19                            | 2                          | 21       | 9.5    |
|                 | Low       | High                         | 7                             | 7                          | 14       | 50.0   |

<sup>a</sup>Nonresponders include patients experiencing stable or progressive disease or those whose best overall response could not be determined.

<sup>b</sup>Responders include patients who achieved complete or partial response.

Abbreviations: IPI, ipilimumab; NIVO, nivolumab; ORR, objective response rate; TMB, tumor mutational burden.

**Supplementary Table 14.** ORR by TMB and CD8 expression status in CheckMate 067

| Treatment       | TMB class | CD8 IHC score | Nonresponders, n <sup>a</sup> | Responders, n <sup>b</sup> | Total, N | ORR, % |
|-----------------|-----------|---------------|-------------------------------|----------------------------|----------|--------|
| <b>NIVO</b>     | High      | Low           | 9                             | 6                          | 15       | 40.0   |
|                 | High      | High          | 5                             | 13                         | 18       | 72.2   |
|                 | Low       | Low           | 15                            | 3                          | 18       | 16.7   |
|                 | Low       | High          | 9                             | 7                          | 16       | 43.8   |
| <b>NIVO+IPI</b> | High      | Low           | 6                             | 14                         | 20       | 70.0   |
|                 | High      | High          | 7                             | 16                         | 23       | 69.6   |
|                 | Low       | Low           | 9                             | 10                         | 19       | 52.6   |
|                 | Low       | High          | 8                             | 7                          | 15       | 46.7   |
| <b>IPI</b>      | High      | Low           | 13                            | 2                          | 15       | 13.3   |
|                 | High      | High          | 23                            | 7                          | 30       | 23.3   |
|                 | Low       | Low           | 20                            | 2                          | 22       | 9.1    |
|                 | Low       | High          | 11                            | 2                          | 13       | 15.4   |

<sup>a</sup>Nonresponders include patients experiencing stable or progressive disease or those whose best overall response could not be determined.

<sup>b</sup>Responders include patients who achieved complete or partial response.

Abbreviations: IHC, immunohistochemistry; IPI, ipilimumab; NIVO, nivolumab; ORR, objective response rate; TMB, tumor mutational burden.

**Supplementary Table 15.** Genes assessed in tumor mutation analysis of WES-evaluable patients in CheckMate 067

| <b>Pathway</b>                          | <b>Gene</b>    | <b>Mutant, n</b> | <b>Wild-type, n</b> |
|-----------------------------------------|----------------|------------------|---------------------|
| <b>Antigen presentation</b>             | Any gene       | 10               | 528                 |
|                                         | <i>B2M</i>     | 8                | 530                 |
|                                         | <i>HLA-A</i>   | 0                | 538                 |
|                                         | <i>HLA-B</i>   | 2                | 536                 |
|                                         | <i>HLA-C</i>   | 0                | 538                 |
|                                         | <i>HLA-E</i>   | 0                | 538                 |
|                                         | <i>TAP1</i>    | 0                | 538                 |
|                                         | <i>TAP2</i>    | 0                | 538                 |
| <b>IFN<math>\gamma</math> signaling</b> | Any gene       | 54               | 484                 |
|                                         | <i>IFNGR1</i>  | 9                | 529                 |
|                                         | <i>IFNGR2</i>  | 4                | 534                 |
|                                         | <i>JAK1</i>    | 10               | 528                 |
|                                         | <i>JAK2</i>    | 12               | 526                 |
|                                         | <i>STAT1</i>   | 12               | 526                 |
|                                         | <i>STAT2</i>   | 11               | 527                 |
|                                         | <i>STAT3</i>   | 6                | 532                 |
| <b>NRF-KEAP</b>                         | Any gene       | 11               | 527                 |
|                                         | <i>KEAP1</i>   | 6                | 532                 |
|                                         | <i>NFE2L2</i>  | 5                | 533                 |
| <b>PBAF</b>                             | Any gene       | 138              | 400                 |
|                                         | <i>ARID1A</i>  | 47               | 491                 |
|                                         | <i>ARID2</i>   | 56               | 482                 |
|                                         | <i>PBRM1</i>   | 26               | 512                 |
|                                         | <i>SMARCA4</i> | 45               | 493                 |
| <b>PTEN-STK11</b>                       | Any gene       | 37               | 501                 |
|                                         | <i>PTEN</i>    | 33               | 505                 |
|                                         | <i>STK11</i>   | 5                | 533                 |
| <b>RAS/RAF</b>                          | Any gene       | 379              | 159                 |
|                                         | <i>BRAF</i>    | 204              | 334                 |
|                                         | <i>NF1</i>     | 83               | 455                 |
|                                         | <i>NRAS</i>    | 144              | 394                 |
| <b>WNT/<math>\beta</math>-catenin</b>   | Any gene       | 120              | 418                 |
|                                         | <i>APC</i>     | 49               | 489                 |
|                                         | <i>AXIN2</i>   | 13               | 525                 |
|                                         | <i>CTNNB1</i>  | 28               | 510                 |
|                                         | <i>DKK1</i>    | 2                | 536                 |
|                                         | <i>DKK2</i>    | 35               | 503                 |
|                                         | <i>RNF43</i>   | 16               | 522                 |

Abbreviation: WES, whole-exome sequencing.



**Supplementary Table 16.** ORR by pathway-level mutation status of tumors for CheckMate 067

| Pathway                | Status    | NIVO               |                   |          |        | NIVO+IPI           |                   |          |        | IPI                |                   |          |        |
|------------------------|-----------|--------------------|-------------------|----------|--------|--------------------|-------------------|----------|--------|--------------------|-------------------|----------|--------|
|                        |           | NR, n <sup>a</sup> | R, n <sup>b</sup> | Total, N | ORR, % | NR, n <sup>a</sup> | R, n <sup>b</sup> | Total, N | ORR, % | NR, n <sup>a</sup> | R, n <sup>b</sup> | Total, N | ORR, % |
| Antigen presentation   | Mutant    | 1                  | 2                 | 3        | 66.7   | 1                  | 2                 | 3        | 66.7   | 3                  | 1                 | 4        | 25.0   |
|                        | Wild-type | 93                 | 80                | 173      | 46.2   | 77                 | 104               | 181      | 57.5   | 139                | 35                | 174      | 20.1   |
| IFN $\gamma$ signaling | Mutant    | 7                  | 9                 | 16       | 56.3   | 9                  | 13                | 22       | 59.1   | 12                 | 4                 | 16       | 25.0   |
|                        | Wild-type | 87                 | 73                | 160      | 45.6   | 69                 | 93                | 162      | 57.4   | 130                | 32                | 162      | 19.8   |
| NRF-KEAP               | Mutant    | 0                  | 6                 | 6        | 100.0  | 1                  | 3                 | 4        | 75.0   | 1                  | 0                 | 1        | 0.0    |
|                        | Wild-type | 94                 | 76                | 170      | 44.7   | 77                 | 103               | 180      | 57.2   | 141                | 36                | 177      | 20.3   |
| PBAF                   | Mutant    | 22                 | 26                | 48       | 54.2   | 14                 | 28                | 42       | 66.7   | 35                 | 13                | 48       | 27.1   |
|                        | Wild-type | 72                 | 56                | 128      | 43.8   | 64                 | 78                | 142      | 54.9   | 107                | 23                | 130      | 17.7   |
| PTEN-STK11             | Mutant    | 4                  | 7                 | 11       | 63.6   | 1                  | 5                 | 6        | 83.3   | 17                 | 3                 | 20       | 15.0   |
|                        | Wild-type | 90                 | 75                | 165      | 45.5   | 77                 | 101               | 178      | 56.7   | 125                | 33                | 158      | 20.9   |
| RAS/RAF                | Mutant    | 60                 | 62                | 122      | 50.8   | 52                 | 76                | 128      | 59.4   | 100                | 29                | 129      | 22.5   |
|                        | Wild-type | 34                 | 20                | 54       | 37.0   | 26                 | 30                | 56       | 53.6   | 42                 | 7                 | 49       | 14.3   |
| WNT/ $\beta$ -catenin  | Mutant    | 18                 | 27                | 45       | 60.0   | 15                 | 25                | 40       | 62.5   | 24                 | 11                | 35       | 31.4   |
|                        | Wild-type | 76                 | 55                | 131      | 42.0   | 63                 | 81                | 144      | 56.3   | 118                | 25                | 143      | 17.5   |

<sup>a</sup>Nonresponders include patients experiencing stable or progressive disease or those whose best overall response could not be determined.

<sup>b</sup>Responders include patients who achieved complete or partial response.

Abbreviations: IPI, ipilimumab; NIVO, nivolumab; NR, nonresponders; ORR, objective response rate; R, responders.

**Supplementary Table 17.** Response in patients with stabilizing mutations in  $\beta$ -catenin in CheckMate 067

| <b>Treatment</b> | <b><math>\beta</math>-catenin tumor mutation status</b> | <b>Nonresponders, n<sup>a</sup></b> | <b>Responders, n<sup>b</sup></b> | <b>ORR, %</b> |
|------------------|---------------------------------------------------------|-------------------------------------|----------------------------------|---------------|
| <b>NIVO</b>      | Other mutation                                          | 0                                   | 1                                | 100.0         |
|                  | Stabilizing mutation                                    | 2                                   | 6                                | 75.0          |
|                  | None detected                                           | 92                                  | 75                               | 44.9          |
| <b>NIVO+IPI</b>  | Other mutation                                          | 0                                   | 3                                | 100.0         |
|                  | Stabilizing mutation                                    | 2                                   | 4                                | 66.7          |
|                  | None detected                                           | 76                                  | 99                               | 56.6          |
| <b>IPI</b>       | Other mutation                                          | 3                                   | 0                                | 0             |
|                  | Stabilizing mutation                                    | 3                                   | 4                                | 57.1          |
|                  | None detected                                           | 136                                 | 32                               | 19.0          |

<sup>a</sup>Nonresponders include patients experiencing stable or progressive disease or those whose best overall response could not be determined.

<sup>b</sup>Responders include patients who achieved complete or partial response.

Abbreviations: IPI, ipilimumab; NIVO, nivolumab; ORR, objective response rate.

**Supplementary Table 18.** Response in patients with stabilizing mutations in genes of the WNT– $\beta$ -catenin pathway in CheckMate 067

| Gene          | Status    | NIVO               |                   |        | NIVO+IPI           |                   |        | IPI                |                   |        |
|---------------|-----------|--------------------|-------------------|--------|--------------------|-------------------|--------|--------------------|-------------------|--------|
|               |           | NR, n <sup>a</sup> | R, n <sup>b</sup> | ORR, % | NR, n <sup>a</sup> | R, n <sup>b</sup> | ORR, % | NR, n <sup>a</sup> | R, n <sup>b</sup> | ORR, % |
| <b>APC</b>    | Mutant    | 7                  | 7                 | 50.0   | 9                  | 10                | 52.6   | 12                 | 4                 | 25.0   |
|               | Wild-type | 87                 | 75                | 46.3   | 69                 | 96                | 58.2   | 130                | 32                | 19.8   |
| <b>AXIN2</b>  | Mutant    | 3                  | 3                 | 50.0   | 3                  | 0                 | 0.0    | 4                  | 0                 | 0.0    |
|               | Wild-type | 91                 | 79                | 46.5   | 75                 | 106               | 58.6   | 138                | 36                | 20.7   |
| <b>CTNNB1</b> | Mutant    | 2                  | 7                 | 77.8   | 2                  | 7                 | 77.8   | 6                  | 4                 | 40.0   |
|               | Wild-type | 92                 | 75                | 44.9   | 76                 | 99                | 56.6   | 136                | 32                | 19.0   |
| <b>DKK1</b>   | Mutant    | 0                  | 1                 | 100.0  | 0                  | 0                 | NA     | 1                  | 0                 | 0.0    |
|               | Wild-type | 94                 | 81                | 46.3   | 78                 | 106               | 57.6   | 141                | 36                | 20.3   |
| <b>DKK2</b>   | Mutant    | 6                  | 12                | 66.7   | 1                  | 8                 | 88.9   | 3                  | 5                 | 62.5   |
|               | Wild-type | 88                 | 70                | 44.3   | 77                 | 98                | 56.0   | 139                | 31                | 18.2   |
| <b>RNF43</b>  | Mutant    | 4                  | 4                 | 50.0   | 0                  | 3                 | 100.0  | 4                  | 1                 | 20.0   |
|               | Wild-type | 90                 | 78                | 46.4   | 78                 | 103               | 56.9   | 138                | 35                | 20.2   |

<sup>a</sup>Nonresponders include patients experiencing stable or progressive disease or those whose best overall response could not be determined.

<sup>b</sup>Responders include patients who achieved complete or partial response.

Abbreviations: IPI, ipilimumab; NIVO, nivolumab; NR, nonresponders; ORR, objective response rate; R, responders.

## References

1. Spranger S, Bao R, Gajewski TF. Melanoma-intrinsic beta-catenin signalling prevents anti-tumour immunity. *Nature* **2015**;523(7559):231–5.
2. DanaHER P, Warren S, Lu R, Samayoa J, Sullivan A, Pekker I, *et al.* Pan-cancer adaptive immune resistance as defined by the Tumor Inflammation Signature (TIS): results from The Cancer Genome Atlas (TCGA). *J Immunother Cancer* **2018**;6(1):63.
3. Ayers M, Lunceford J, Nebozhyn M, Murphy E, Loboda A, Kaufman DR, *et al.* IFN-gamma-related mRNA profile predicts clinical response to PD-1 blockade. *J Clin Invest* **2017**;127(8):2930–40.
